# Elucidation of sub-cellular H<sub>2</sub>S metabolism in *Solanum lycopersicum* L. and its assessment under development and biotic stress

Aksar Ali Chowdhary<sup>1</sup>, Sonal Mishra<sup>2</sup>, Vikram Singh<sup>3</sup>, Vikas Srivastava<sup>1\*</sup>

<sup>1</sup>Department of Botany, School of Life Sciences, Central University of Jammu, Samba, Jammu and Kashmir (UT), India

<sup>2</sup>School of Biotechnology, University of Jammu, Jammu, Jammu and Kashmir (UT), India

<sup>3</sup>Centre for Computational Biology and Bioinformatics, School of Life Sciences, Central University of Himachal Pradesh, Himachal Pradesh, India

\*Author for Correspondence

Dr. Vikas Srivastava: [vikas.bot@cu-jammu.ac.in](mailto:vikas.bot@cu-jammu.ac.in); [vikassrivastava25@gmail.com](mailto:vikassrivastava25@gmail.com)

## Abstract

The signalling molecules serve as a fundamental requirement in plants and respond to various internal and external cues. Among several signalling molecules, the significance of gasotransmitters has been realized in several plant developmental and environmental constraints. The hydrogen sulfide (H<sub>2</sub>S) is a novel signalling molecule in higher plants and is involved in several physiological processes right from seed germination to flowering and fruit ripening. Moreover, H<sub>2</sub>S also assist plants in managing biotic and abiotic stresses, therefore serves as one of the imperative choice of chemical priming. Yet, the metabolism of H<sub>2</sub>S is not much explored and only appraisal study is made till date from *Arabidopsis thaliana*. Therefore, the present investigation explored the elucidation of H<sub>2</sub>S metabolism in crop plant *Solanum lycopersicum* L. Through in silico investigations the study demonstrated the participation of 29 proteins involved in H<sub>2</sub>S metabolism, which are mainly localized in cytosol, chloroplast, and mitochondria. Additionally, the relevant protein-protein interactomes were also inferred for sub-cellular compartments and expression data were explored under development and biotic stresses namely PAMPs treatment and bacterial infection. The information generated here will be of high relevance to better target the H<sub>2</sub>S metabolism to enhance the tomato prospects and also serve a preliminary investigation to be adopted in other agronomic important crops.

**Keywords:** Chloroplast, Cysteine, Cytosol, Hydrogen sulfide, In silico, Metabolism, Mitochondria, Sulfur

## 1. Introduction

The assessment of hydrogen sulfide (H<sub>2</sub>S - a gasotransmitter; with characteristic rotten egg like smell) in life forms has dramatically changed from a pollutant (toxic) to an intermediate during sulfur assimilation into cysteine, and has also proven currently as a signalling component (Filipovic and Jovanovic, 2017). Like other

gasotransmitters (NO and CO), H<sub>2</sub>S is also known to be able to cross cell membrane without receptors (Guo et al., 2016). The functionality of H<sub>2</sub>S primarily depends on its concentration and offer toxicity and signalling role at high and low concentrations, respectively (Dooley et al., 2013). The function of H<sub>2</sub>S-mediated signaling is a widespread incident and is conserved throughout diverse life forms. In animals, H<sub>2</sub>S was reported to function as neuro-modulator in brain cells and found to be involved in physiological and pathological processes, such as apoptosis and inflammatory progression (Jin and Pei et al, 2015). In plants, the contribution of H<sub>2</sub>S is observed in the regulation of several developmental traits and protection against several abiotic and biotic stresses (Corpas, 2019). The major physiological and developmental process in which H<sub>2</sub>S regulation was observed includes seed germination, organogenesis, stomatal closure/aperture, modulation of photosynthesis, autophagy regulation etc (Aroca et al., 2018; Arif et al., 2021). The H<sub>2</sub>S-mediated protection and tolerance was observed in almost all category of abiotic stress including oxidative (Corpas, 2019; Corpas and Palma, 2020), heavy metal (Li et al., 2012; Kharbech et al., 2017; Kharbech et al., 2020), salt (Mostofa et al., 2015; Ding et al., 2019), drought (Chen et al., 2016; Zhou et al., 2020), heat (Zhou et al., 2018), chilling (Pan et al., 2020) and waterlogging (Xiao et al., 2020) stress. Apart, the contribution of H<sub>2</sub>S was also observed for the development of resistance against phytopathogens (Vojtovič et al., 2020). Due to its immense potential for the development of stress tolerance features, like phytohormones (Mishra et al., 2020) and GABA (Srivastava et al., 2021) it is also useful for chemical priming to develop cross-adaption for stress tolerance (Ahmed et al., 2021). Besides, its contribution towards enhanced production of metabolites was also reported (Li et al., 2016). Additionally, the H<sub>2</sub>S also trigger post translation modifications (through persulfidation), which lead to the significant modulation in the activities of proteins/enzymes being persulfidated (Park et al., 2015; Filipovic et al., 2018). Further a study reported that under baseline condition, 5% of Arabidopsis proteome may undergo persulfidation (Aroca et al., 2015; Aroca et al., 2017). Such persulfidation may lead to either activation (APX, LCD, RBOHD etc.) or inhibition (Catalase, NADP-Isocitrate dehydrogenase etc.) of concerned enzymes (Aroca et al., 2015; Corpas et al., 2019; Shen et al., 2020; Munoz-Vargas et al., 2018 & 2020). These studies hence suggested that the H<sub>2</sub>S offer their biological potential by regulation of ROS and antioxidant machinery, which are the important signalling component for plant development and stress response (Mishra et al., 2017). The sub-cellular locations of H<sub>2</sub>S metabolism was primarily reported to be in the cytosol, chloroplast and mitochondria (Gonzalez-Gordo et al., 2020), and involve several enzymatic components for H<sub>2</sub>S production and consumption (Li, 2015; Gonzalez-Gordo et al., 2020; Arif et al., 2021).

Though several aspects of H<sub>2</sub>S mediated stress tolerance and individual H<sub>2</sub>S enzyme associated biological features are known in plants, yet the cumulative account of the enzymatic sub-cellular network for its metabolism is poorly established, except for the Arabidopsis. (González-Gordo et al., 2020). We here attempted to elucidate the H<sub>2</sub>S metabolism in *Solanum lycopersicum* L. (tomato, formerly *Lycopersicon esculentum* Mill.) and established their functional relevance. In the present study, the focus involves the identification of tomato H<sub>2</sub>S metabolism associated enzymes and their sub-cellular locations, towards developing a working model for H<sub>2</sub>S metabolism in tomato. Along, the compartment specific interactions of enzymes associated with H<sub>2</sub>S

metabolism were also undertaken. Besides, the expression analysis of genes coding for proteins involved in H<sub>2</sub>S production and consumption have also been assessed under developmental and pathogenic situations using gene expression analysis. The study will offer ways to better understand the H<sub>2</sub>S metabolism in tomato and offer reasonable insights for the betterment of tomato productivity.

## 2. Materials and Methods

### 2.1. Database Search

National Center for Biotechnology Information (<https://www.ncbi.nlm.nih.gov/>) and Sol Genomic Network (<https://solgenomics.net/>) were used to retrieve the proteins associated with H<sub>2</sub>S metabolism in *S. lycopersicum* by using BLAST (BLASTP and TBLASTN) analysis. All the 26 proteins associated with H<sub>2</sub>S metabolism reported in *A. thaliana* (González-Gordo et al., 2020) were used as query. The retrieved proteins of tomato with a highly stringent E-value, namely, less than 10<sup>-10</sup> was considered for the study. Further, these proteins were also subjected to the reverse BLAST in TAIR (<https://www.arabidopsis.org/Blast/index.jsp>), to identify their closest orthologs in Arabidopsis. All the retrieved sequences were then subjected for the functional domain analysis using NCBI-CDD search, to filter out any proteins not related to H<sub>2</sub>S metabolism. The identified proteins were named either (i) as reported earlier in tomato, and/or (ii) considering the information as given in the Arabidopsis model (González-Gordo et al., 2020; Hu et al., 2020; Liu et al., 2019). The functional assignment of the identified proteins was done by considering information from solgenomics (<https://solcyc.solgenomics.net/>), orthologs function in Arabidopsis, CDD search and BLAST results. All the identified proteins were given names according to their appearance in the genome; however, the previously assigned names were kept as such (Liu et al., 2019; Hu et al., 2020).

### 2.2. Sub-cellular localization

The sub-cellular localization of proteins was predicted based on their analysis using 12 independent sub-cellular localization tools viz, WoLF PSORT (Horton et al., 2007), Deeploc 1.0 (Armenteros et al., 2017), ChloroP 1.1. (Emanuelsson et al., 2019), TargetP 2.0 (Armenteros et al., 2019a), Plant-mSubP (Sahu et al., 2020), BUSCA (Savojardo et al., 2018), LOC TREE 3 (Goldberg et al., 2014), DeepMito (Savojardo et al., 2020), LOCALIZER (Sperschneider et al., 2017), CELLO2GO (Yu et al., 2014), SignalP-5.0 (Armenteros et al., 2019b) and DeepSig (Savojardo et al., 2018). Out of them, most of the predictions from SignalP-5.0 and DeepSig, were falling into “other” categories, thus not considered further. The information from remaining 10 prediction tools were used to develop a confidence score (Number of occurrence at particular location/ Total number of prediction tools explored). A particular protein was assigned the sub-cellular location with maximum confidence score. However, for the proteins predicted to be localized in two sub-cellular compartments, support from sub-cellular localization of their orthologous proteins in Arabidopsis and information from previous research studies were also taken into consideration (Liu et al., 2019; Hu et al., 2020).

## 2.3. PPI Network Analysis

To further substantiate the functional pertinence of *S. lycopersicum* proteins under investigation, conserved domains were searched in these proteins identified using NCBI Conserved Domain Search-NIH Database (<https://www.ncbi.nlm.nih.gov/Structure/cdd/wrpsb.cgi>). The sequences were then considered for PPI (protein-protein interaction) network analysis. The STRING database v11 (Szklarczyk et al., 2019) was used for the analysis of protein-protein interaction, using compartment specific identified proteins as inputs for analysis. The confidence view was generated by setting the filter to medium confidence (0.400).

## 2.4. Gene Expression Analysis

The expression analysis of genes associated with the production and consumption of H<sub>2</sub>S (between cysteine and H<sub>2</sub>S) was performed using RNA-Seq data, available in tomato functional genomic database (<http://ted.bti.cornell.edu/cgi-bin/TFGD/digital/home.cgi>). The assessment of genes associated with cytosolic H<sub>2</sub>S metabolism utilizes the expression of *SILCD1*, *SIOAS1*, *SIOAS2*, *SIOAS3*, *SIOAS4*, *SILCD2*, *SIOAS6* and *SIOAS9*. The expression data of *SILCD2*, *SINFS2*, *SIOAS5* and *SISIR1* were used for the study of chloroplastic H<sub>2</sub>S metabolism, and of *SILCD1*, *SIOAS7* and *SINFS1* were analyzed for mitochondrial H<sub>2</sub>S metabolism. For the assessment of tissue specific expression, data from D004 experiment was utilized. In brief, the Heinz cultivar was used for the assessment of the expression of associated genes under different development stages viz, unopened flower buds, fully opened flowers, 1 cm fruits, 2 cm fruits, 3 cm fruits, mature green fruits, breaker fruits, breaker fruits+10 fruits, leaves and roots. Rio Grande prf3 (deletion in Prf) cultivar was used to assess the response under PAMP/biotic stress (D007 experiment). In all the experiments mock samples comprised of MgCl<sub>2</sub>. The expression analysis during PAMPs includes two durations (30 min and 6h) and involve treatments of leaves with cold shock protein 22 (csp22), flagellin 22 (flg22), flagellin II-28 (flgII-28), Lipopolysaccharides (LPS) and Peptidoglycan (PGN). The bacterial treatment includes the leaf infection with *Pseudomonas syringae* (DC3000), *P. fluorescens*, *P. putida* and *Agrobacterium tumefaciens*. The expression data was assessed at 30 min and 6 h (Rosli et al. 2013). The expression data was visualized using heat map developed by MeV (Howe et al., 2010).

## 3. Results

### 3.1. Identification of H<sub>2</sub>S metabolism related candidate proteins in tomato.

During cysteine biosynthesis H<sub>2</sub>S serve as an intermediate, and over the time its significance in signalling has been observed in many aspects of plant biology (Corpas, 2019; Liu et al., 2021). The metabolism of H<sub>2</sub>S is not established properly in plants; however Gonzalez-Gordo et al., (2020) recently attempted to identify proteins involved in H<sub>2</sub>S metabolism in *A. thaliana* and presented the working model utilizing proteins directly or indirectly related to the cysteine metabolism. We here attempted to bring together the information of H<sub>2</sub>S metabolism related proteins in *S. lycopersicum* and identification of the remaining candidate proteins through in

silico investigation utilizing information of *A. thaliana* proteins. The contribution of cytosol in the H<sub>2</sub>S metabolism is well known. In the tomato cytosol, the H<sub>2</sub>S metabolism (Table 1) involves the participation of L-Cysteine desulfhydrase (SILCD1 and SILCD2), Cysteine synthase / O-acetyl-L-serine (thiol)lyase (SIOAS1, SIOAS2, SIOAS3, SIOAS4, SIOAS6 and SIOAS9), and Selenium binding protein (SISBP1).

The chloroplast is the one of the most important sites of sulfur assimilation into amino acids, which involves sulfate reduction and cysteine production (Birke et al., 2015). Table 2 illustrates the identified enzymes of tomato involved in chloroplastic H<sub>2</sub>S metabolism. In total, 12 enzymes were identified which includes Cystathionine gamma synthase (SICGS1), Thiosulfate sulfurtransferase (SIMST1, SIMST2 and SLMST4), D-cysteine desulfhydrase (SIDCD2), Cysteine desulfurase (SINFS2), Lipoyl synthase (SILIP1 and SILIP3), Cysteine synthase / O-acetyl-L-serine(thiol)lyase (SIOAS5), Cystathionine beta-lyase (SICBL2 and SICBL3) and Sulfite reductase (SISIR1). The contribution of H<sub>2</sub>S is evident in mitochondria as it affects mitochondrial electron transport chain by inhibiting cytochrome c oxidase (Complex IV). It contributed significantly in processes related to energy production and cellular ageing, particularly during drought stress (Birke et al., 2013; Jing et al., 2018). Our analysis suggested six enzymes responsible for mitochondrial H<sub>2</sub>S metabolism, viz. D-cysteine desulfhydrase (SIDCD1), Cysteine synthase / O-acetyl-L-serine (thiol) lyase (SIOAS7), Cysteine desulfurase (SINFS1), Bifunctional L-3-cyanoalanine synthase/ cysteine synthase (Soly04g058120.3.1, SICYSC2; not considered further as its expression was not observed in any of the developmental tissue), Lipoyl synthase (SILIP2) and Bifunctional L-3-cyanoalanine synthase/ cysteine synthase / O-acetyl-L-serine (thiol) lyase (SIOAS8) (Table 3). The location of Soly06g009860.1.1 (named as SIMST3) was observed as extracellular, which possess mercaptopyruvate sulfurtransferase activity. Besides, we also could not get the localization consensus for Soly04g055230.2.1, which appears to be Cystathionine-β-lyase (named as SICBL1). Both of these proteins (SIMST3 and SICBL1) were not used for the current model, though their functionality in tomato cannot be denied. The proteins localized in cytosol, chloroplast and mitochondria were utilized for the depiction of putative working model of H<sub>2</sub>S metabolism in tomato (Fig. 1).

### 3.2. PPI of H<sub>2</sub>S metabolism related proteins in tomato

The sub-cellular protein-protein interaction (PPI) network was developed for the proteins localized in cytosol, chloroplast and mitochondria (Fig. 2). The network of cytosolic enzymes associated with H<sub>2</sub>S metabolism in *S. lycopersicum* demonstrated that out of nine proteins, eight proteins (except SISBP1) i.e SILCD1, SIOAS2, SIOAS6, SIOAS9, SIOAS1, SILCD2, SIOAS3 and SIOAS4 exhibited a strong and direct interactions among themselves. However, no interaction was observed with SISBP1, which corroborated with the findings in Arabidopsis (Gonzalez-Gordo et al., 2020). PPI network of chloroplast enzymes suggested that all the twelve proteins are interacted with each other, there by forming a network. However, some of the proteins have a strong interaction, namely, SICBL3, SIOAS5, SICGS1, SIMST1, SIMST4, SIDCD2, SINFS2, SISIR1, SICBL2 while proteins SILIP3, SISIR1, SIDCD2 and SILIP1 showed weak interactions with each other. Analysis of mitochondrial proteins interaction demonstrated that all the five proteins demonstrated interaction, but forming

two groups. Further, strong interaction was observed between SIOAS7 and SIOAS8. The SINFS1 exhibited interaction with SILIP2 and SIDCD1, in which the former is comparatively stronger. The reasonable interactions among the enzymes involved in H<sub>2</sub>S metabolism corroborated with the findings in Arabidopsis (Gonzalez-Gordo et al., 2020).

### 3.3. Expression of genes associated with H<sub>2</sub>S metabolism

The in silico expression data available for Heintz and Rio Grande prf3 (deletion in Prf) cultivar was used for expression study under development and biotic stress, respectively. In particular, the focus here is to evaluate the expression of genes associated with either H<sub>2</sub>S production or consumption, to identify the significance of genes from each category under both conditions (Fig 3).

#### 3.3.1. Expression under different developmental stages

All the genes exhibited differential expression at diverse developmental stages (Fig 3A). Among genes associated with cytosolic H<sub>2</sub>S metabolism, the highest expression of *SIOAS6* was observed in leaves. The expression of *SILCD1*, *SILCD2*, and *SIOAS9* demonstrated highest expression in ‘3 cm fruits’. The *SIOAS1*/*SIOAS2*/*SIOAS3* and *SIOAS4* demonstrated highest expression in ‘unopened flower buds’ and ‘1 cm fruits’, respectively. The expression of genes associated with chloroplast metabolism exhibited highest expression as follows: *SIOAS5* (leaves), *SIDCD2* (breaker fruits), *SlSiR1* (fully opened flowers) and *SINFS2* (breaker+10 fruits). The genes associated with mitochondrial H<sub>2</sub>S metabolism exhibited highest expression in tissues such as *SINFS1* (breaker+10 fruits), *SIOAS7* (breaker fruits), and *SIDCD1* (1cm fruits). The study suggested that H<sub>2</sub>S metabolism plays significant contribution in tomato developmental stages and is specifically involves in stages of fruit ripening.

#### 3.3.2. Expression in response to PAMP treatments

The expression analysis suggested that among genes associated with cysteine synthase activity, the contribution of *SIOAS6* is very high. During 30 min of PAMP treatment its expression was down-regulated, however, at late stage (6 h) it was observed significantly up-regulated. Amongst, the highest expression was observed in response to csp22 and lowest in response to PGN. Similar trend was observed in case of *SIOAS9*, and the highest expression was observed in response to flgII-28. In the *SIOAS1*, *SIOAS2* and *SIOAS3*, modulation was not much significant; however *SIOAS2* demonstrated up-regulation at flg28 and flg28, LPS & PGN at 30 min and 6 h, respectively. We could not get rpkm value for *SIOAS4* at 30 min; however, at 6 h this gene demonstrated down-regulation. The *SILCD1* was also not much modulated at 30 min, however exhibited up-regulation at 6 h with few PAMP such as LPS. Among genes associated with chloroplast H<sub>2</sub>S metabolism, the *SIOAS5* and *SINFS2* did not showed much deviation at 30 min; however, they exhibited slight down-regulation with all PAMPs at late stage (6h). The *SlSiR1* and *SIDCD2* exhibited up-regulation, with few PAMPs at 6 h. In mitochondria, the *SIOAS7* significantly demonstrated up-regulation and down-regulation during early (30 min) and late (6 h)



stages, respectively which were reversed in *SINFS1*. No significant modulation was observed for *SIDCD1* (Fig 3B).

### 3.3.3. Expression in response to bacterial treatments

In cytosol, *SIOAS6* demonstrated modulations at 6h only and significant up-regulation was observed in the samples treated with *P. fluorescence* and *P. putida*. *SIOAS2* and *SIOAS9* also demonstrated up-regulation with bacterial treatments at both durations and only 6 h, respectively. *SIOAS3* demonstrated up-regulation at 30 min however at 6 h it was down-regulated for *Pseudomonas* sps and upregulated for *A. tumifaciens*. Not much modulation was observed for *SIOAS1* and *SILCD1*. With different bacterial treatments, not much effect was noticed at 30 min for chloroplast gene *SIOAS5*; however at 6 h significant down-regulation was observed in samples treated with *Pseudomonas* sps, and up-regulation with *Agrobacterium tumifaciens*. Not much modulation was observed in case of *SIDCD2* and *SISIR1*. In case of *SINFS2*, down-regulation was noticed with *P. fluorescence* and *P. putida*. In mitochondria, the expression of *SIOAS7* suggested down-regulation for all *Pseudomonas* sps, and up-regulation for *A. tumifaciens* at 6 h. Further, *SINFS1* demonstrated up-regulation mainly for *Pseudomonas* sps. In case of *SIDCD1* not much modulation was observed at 30 min; however at 6 h slight downregulation was observed with *P. syringae* and *P. putida* (Fig 3B).

## 4. Discussion

Among plant biomolecules, Sulfur (S) is the basic constituents of certain amino acids viz, cysteine, homocysteine and methionine, and some secondary sulfur molecules like glucosylates, phytochelatins, polysulfides and sulfolipids (Beinert, 2000; Münchberg et al., 2007; Queval et al., 2009; Shimojima, 2011; Takahashi et al., 2011; Romero et al., 2014; Fuentes-Lara et al., 2019). Further, under stress conditions, it also plays a significant contribution in ROS and RNS related metabolism with a tripeptide like glutathione (GSH) or S-nitrosoglutathione (GSNO) (Noctor et al., 2012; Corpas et al., 2013; Pivato et al., 2014; Hasanuzzaman et al., 2017). In plants, S is uptaken as sulfate ( $\text{SO}_4^{2-}$ ) from soil through specific transporters (SULTR). At organ and tissue level, the localization of SULTR was reported in the roots and vascular tissues, respectively (Gigolashvili and Kopriva, 2014; Yamaguchi et al., 2020). At sub-cellular level, the SULTR in Arabidopsis was also reported from plastid, suggested its contribution in assimilation of  $\text{SO}_4^{2-}$ , along with cytosol. However, other cellular component mitochondria and peroxisome also participated in S metabolism (Gonzalez-Gordo et al., 2020). The assimilation of  $\text{SO}_4^{2-}$  in S metabolism involves the contribution of cytosol, chloroplast, mitochondria and peroxisome; utilizing inorganic S forms viz,  $\text{SO}_4^{2-}$ ,  $\text{SO}_3^{2-}$  and  $\text{H}_2\text{S}$  through reductive pathway utilizing ATP Sulfurylase (APS), APS Reductase (APR) and Sulfite Reductase (Brychkova et al., 2013; Gonzalez Gordo et al., 2020). An enzyme Sulfite Oxidase is responsible for regeneration of sulfate from sulfite. The S from  $\text{H}_2\text{S}$  now enter to the final process of assimilation into amino acid, and involve participation of OASTL (O-acetylserine(thiol)lyase), which produces cysteine (first sulfur-containing organic molecule generated by plants) after utilizing O-acetyl serine and sulfide, and produces acetate as byproduct. Liu et al., (2019) has characterized

8 OASTL in tomato, which were reported to localize at different sub-cellular compartments. However, cysteine can also revert to H<sub>2</sub>S by the participation of NIFS/NFS like protein (chloroplast and mitochondria), L/D-cysteine desulfurylase and Bifunctional L-3-cyanoalanine synthase/cysteine synthase D1 and D2, Bifunctional cystathionine gamma-lyase/ cysteine synthase and pyridoxal-5' -phosphate dependent enzyme family protein, as reported in Arabidopsis (Gonzalez Gordo et al., 2020). The working model for the representation of diverse enzymes involved in H<sub>2</sub>S metabolism is depicted in Figure 1.

#### 4.1. H<sub>2</sub>S metabolism in tomato utilizes different compartments

Our investigation suggested the participation of 29 proteins in tomato H<sub>2</sub>S metabolism (Table S1). The cytosolic H<sub>2</sub>S metabolism utilizes the activity of L-Cysteine desulfhydrase (SILCD1 and SILCD2), Cysteine synthase / O-acetyl-l-serine (thiol) lyase (SIOAS1-4, SIOAS6 and SIOAS9), and Selenium binding protein (SISBP1). In the prediction, we could not find any sulfite reductase, and cystathionine gamma-synthase and cystathionine beta-lyase activity in the cytosol. The SBP is represented by only one member in tomato, contrary to three SBP in Arabidopsis (Gonzalez-Gordo et al., 2020). Liu et al., (2019) have also reported the localization of SIOAS4 in the cytoplasm; however, the location given for other cysteine synthase was somewhat different viz, SIOAS2 in membrane, SIOAS6 in nucleus and SIOAS9 in peroxisome. Interestingly, the clustering of genes encoding for SIOAS was observed at chromosome 1, namely *SIOAS1*, *SIOAS2*, *SIOAS3* and *SIOAS4*. The occurrence of SILCD1 in the nucleus was also reported (Hu et al., 2020), which suggested that possibly the enzymes associated with H<sub>2</sub>S/cysteine metabolism are present in the nucleus by the activity of SILCD1 (Hu et al., 2020) and SIOAS6 (Liu et al., 2020). But as we have also observed their presence in the cytosol through consensus score developed after analysis of 10 prediction tools, their activity in the cytosol (40% confidence) cannot be denied, though need further investigations. For SIOAS9, none of the prediction tool has demonstrated its presence in peroxisome. Further, we cannot deny the sub-cellular location of SIOAS9 in peroxisome, as this sub-cellular compartment is known for H<sub>2</sub>S metabolism. The peroxisome is the single membrane bound sub-cellular body actively engaged in nitro-oxidative metabolism (Corpas et al., 2019; Corpas and Palma, 2020). In tomato, no enzymatic source for H<sub>2</sub>S metabolism was observed in peroxisome, which is similar in Arabidopsis (Gonzalez-Gordo et al., 2020). In our prediction, we have observed the extracellular location of mercaptopyruvate sulfurtransferase (SIMST3) with high consensus score (40%), therefore, this protein has not been assigned to any sub-cellular location. Additionally, the location of Solyc04g055230.2.1 (SICBL1) is also dicey, as it demonstrated opportunity to be localized equally, in almost all locations. Both SIMST3 and SICBL1 are not considered for current model. Further, SIOAS3 was also not considered for current model (Fig. 1), as it does not produce functional OAS like protein, as reported previously (Liu et al., 2019).

The chloroplast is the site of sulfur assimilation into amino acids, which involves sulfate reduction by the activity of two enzymes (adenosine-5' -phosphosulfate, APS and adenosine-5'-reductase, APR) into sulfite and to sulfide (by the activity of sulfite reductase) and cysteine production. The later includes the participation of cysteine synthase (OAS-(thiol)lyase, OAS-TL/ OASB) activity which combine H<sub>2</sub>S with O-acetylserine (OAS)



to form cysteine (Birke et al., 2015). In our investigation, we have observed the participation of 12 enzymes as mentioned in section 3.1 (Table 2). Our investigation corroborated the findings of Liu et al., (2019), where they have demonstrated the location of SIOAS5 in chloroplast. Further, the SiR was also reported earlier to be localized in chloroplast (Brychkova et al., 2012). Except lipoyl synthase, all other enzymes are directly involved in the conversion of inorganic sulfur (sulfate and sulfite) to organic forms (Cysteine and homocysteine). The chloroplast H<sub>2</sub>S metabolism was observed similar in Arabidopsis and tomato; however tomato exhibited utilization of D-Cysteine desulfhydrase (as the activity demonstrated by closest ortholog in Arabidopsis, table 2), contrary to L-Cysteine desulfhydrase as reported in Arabidopsis (Gonzalez-Gordo et al., 2020).

The mitochondrial H<sub>2</sub>S metabolism play important role in mitigation of CN inducing toxicity due to the activity of mitochondrial bifunctional L-3-cyanoalanine synthase/cysteine synthase C1 (CYSC1). The enzyme was reported in Arabidopsis to perform detoxification of cyanide and involve conversion of cyanide and cysteine to β-cyanoalanine and hydrogen sulfide (Yamaguchi et al., 2000). In tomato, 5 enzymes were identified to be localized in mitochondria (section 3.1. Table 3). Though our analysis predicted the localization of SIMST4 with high confidence in chloroplast (60% Consensus score), but this enzyme may also be of significance in mitochondria (40% Consensus score). We here propose the dual localization of this protein in both chloroplast and mitochondria (Fig. 1). Though, we could not get the Cystathionine-β-lyase activity in either cytosol or mitochondria, but it is possible that SICBL1 might function in these locations. Further, the SIOAS8 was functionally assigned as L-3-cyanoalanine synthase, which was showing closest homology with At3g61440 (AtCysC1) and suggested for this function by Liu et al., 2019. The experimental data also suggested the localization of SIOAS8 in mitochondria (Liu et al. 2019), thereby testify our prediction. Our analysis suggested that the mitochondrial H<sub>2</sub>S metabolism involves all the proteins as associated in Arabidopsis (Gonzalez-Gordo et al., 2020).

#### 4.2. Proteins associated with H<sub>2</sub>S metabolism in tomato demonstrate compartment specific interaction

Protein–protein interactions (PPIs) signify to understand the important aspect of plant systems biology including metabolism. Further the elucidation of interaction networks provides critical insights into the regulatory aspects of plant proteins in plant developmental processes and its interactions with their environment (Struk et al., 2019). The interaction network of proteins associated with H<sub>2</sub>S metabolism was presented by Gonzalez-Gordo et al., (2020), which demonstrated the significant compartment specific interactome. The PPI analysis suggested the interaction of tomato proteins responsible for H<sub>2</sub>S metabolism in all the cellular compartments. Amongst, all proteins participated in the interaction network of tomato chloroplast; however, in cytosol except SISBP1 all other proteins were found interacting. In cytosol, it was observed that no SIOAS interact with each other, where as these proteins exhibited interaction with both SILCDs, which suggested the H<sub>2</sub>S/Cysteine metabolism related enzymes function in close association and exhibited regulation by interacting with each other viz, SILCD1-SIOAS1, SILCD1-SIOAS2, SILCD1-SIOAS3, SILCD1-SIOAS4, SILCD1-SIOAS6, SILCD1-SIOAS9, SILCD2-SIOAS1, SILCD2-SIOAS2, SILCD2-SIOAS3, SILCD2-SIOAS4, SILCD2-SIOAS6 and SILCD2-SIOAS9. In

chloroplast, also the interaction was observed among enzymes responsible for H<sub>2</sub>S/Cysteine metabolism (SIDCD2-SIOAS5). Along, the other enzymes responsible for H<sub>2</sub>S metabolism also demonstrated considerable interactions. The SILIP proteins of chloroplast also exhibited strong interaction with each other. Further, in mitochondria, two interacting groups were observed viz, SIOAS7-SIOAS8 and SILIP2-SINFS1-SIDCD1. Interestingly, no interaction of enzymes responsible for H<sub>2</sub>S/Cysteine metabolism was observed in mitochondria. In cystein biosynthesis, the interaction of OAS and SAT (Serine acetyl transferase), thus forming cysteine synthase complex as reported in Arabidopsis (Francois et al., 2006). Similarly, such interaction is also reported in tomato (Liu et al., 2019). Our finding offers the formation of possible complex (comprised of H<sub>2</sub>S production and consumption activity) for H<sub>2</sub>S/Cysteine metabolism, present in tomato cell. The study signifies the possibility about the highly coordinated network of proteins associated with H<sub>2</sub>S metabolism in tomato, which is responsible for sulfur metabolism including H<sub>2</sub>S/cysteine homeostasis.

### 4.3. Genes associated with H<sub>2</sub>S metabolism exhibited modulation under development and biotic stress

The genes encoding enzymes responsible for either H<sub>2</sub>S biosynthesis or consumption were utilized for the expression analysis. Over all the assessment of cytosolic (*SILCD1*, *SIOAS1*, *SIOAS2*, *SIOAS3*, *SIOAS4*, *SILCD2*, *SIOAS6* and *SIOAS9*), chloroplastic (*SIDCD2*, *SINFS2*, *SIOAS5* and *SISiR1*) and mitochondrial (*SIDCD1*, *SIOAS7* and *SINFS1*) genes were assessed. In development stages, the *SILCD1/SIOAS6*, *SIOAS5* and *SINFS1* were observed as highly expressed genes in cytosol, chloroplast and mitochondria, respectively; however, they exhibited peak expression in different tissues as mentioned in results section (Fig. 3). The high activity of H<sub>2</sub>S biosynthetic genes *SILCD1* and *SILCD2* during stages of fruit development is possibly compensated by activity of cysteine synthase activity (mostly offered by *SIOAS6*). The findings corroborated with the results of Hu et al., (2020), which exhibited accelerated fruit ripening in *SILCD1* silenced and CRISPR/Cas9 mediated *SILCD1* gene-edited mutant. The study has also reported the high *SILCD1* expression during fruit ripening and suggested the role of *SILCD1* and H<sub>2</sub>S in the regulation of fruit ripening, which is similar to our study. The increase in cytosolic H<sub>2</sub>S and L-cysteine desulfhydrase activity was also observed in sweet pepper (*Capsicum annuum* L.) fruit ripening (Muñoz-Vargas et al., 2018). Further, the substantial production of cytosolic *SILCD1* and *SIOAS6* in all tissues, demonstrated that the encoded proteins of these genes possibly play crucial role and mainly responsible for the H<sub>2</sub>S mediated response in plant development.

During biotic stress, the significant modulation in the expression of H<sub>2</sub>S production and consumption associated genes was also observed. Interestingly, *SILCD1*, *SILCD2*, *SIOAS9*, *SISiR1* and *SINFS1* were observed as late responsive and their up-regulation was mostly observed at 6 h of PAMP treatment/bacterial infection, which suggested the significance of H<sub>2</sub>S during plant-pathogen interaction. Contrary to this, *SIOAS7* was observed as early responsive. Vojtovic et al., (2021) have reviewed the contribution of H<sub>2</sub>S in plant defense. A study of knockout mutants to plant pathogen in Arabidopsis demonstrated that the high resistance to biotrophic and necrotrophic pathogens in *des1* mutant and sensitivity in *oas-a1* mutant (Alvarez et al., 2012). In our study, the cytosolic *SIOAS6* and *SIOAS9* expression was down-regulated during early stage of PAMP treatment, which

otherwise up-regulated at later stage, which might be related with the contribution of encoded cysteine synthase activity in PAMP resistance at 6 h, which was most prominent in case of *csp22* and *flgII-28*, respectively. However, the *SILCD1* though demonstrated similar trend, but exhibited up-regulation with few PAMP such as LPS. Further, in chloroplast and mitochondria, the contribution of *SIOAS5-SINFS2* and *SIOAS7-SINFS1* play a significant role in H<sub>2</sub>S consumption, and production respectively (Fig 3). In response to bacterial infection, up-regulation of *SIOAS2*, *SIOAS6* and *SIOAS9* demonstrated up-regulation; however, *SIOAS7* showed down-regulation for *Pseudomonas* sps, and up-regulation for *A. tumefaciens* at 6 h. Among gene responsible for H<sub>2</sub>S production, *SINFS2* demonstrated down-regulation in response to *P. fluorescence* and *P. putida*; *SINFS1* demonstrated up-regulation mainly for *Pseudomonas* sps and *SILDCD1* exhibited down-regulation with *P. syringae* and *P. putida* at 6 h duration. The finding clearly demonstrates the significant modulation of genes associated with H<sub>2</sub>S production and consumption activity and thus testifies their contribution in related events.

## 5. Conclusion

In nut shell, the exploration of genes associated with H<sub>2</sub>S metabolism was explored in tomato. Over all 29 proteins were identified, which are related to tomato H<sub>2</sub>S metabolism. The study also offers an insight on their potential interaction at sub-cellular level. The results demonstrated the significant interaction among the proteins present in cellular compartments such as cytosol, chloroplast and mitochondria. Further, the expression of selective genes was studied under diverse developmental and biotic stress conditions. The specific expression pattern of genes associated with H<sub>2</sub>S production and consumption demonstrated their occurrence in critical events related to development, particularly fruit development. Moreover, their regulation under biotic stress (PAMP and bacterial treatment) offers considerable support to visualize and explore their function in relation to plant-pathogen interaction. Over all, we believe that investigation of this important metabolism in economically important horticulture crop (tomato) will open new prospect for the investigation of various biological functions.

## Author contributions:

VS<sup>1</sup>: Framing the concept; AAC<sup>1</sup>, SM<sup>2</sup>, VS<sup>3</sup> and VS<sup>1</sup>: Performed analysis and Manuscript writing; AAC<sup>1</sup>, SM<sup>2</sup> and VS<sup>1</sup>: Figures and tables preparation; VS<sup>1</sup> and VS<sup>3</sup>: Correction and edited the manuscript.

**Acknowledgements:** AAC<sup>1</sup> and VS<sup>1</sup> acknowledge Central University of Jammu for providing working facility. VS<sup>1</sup> also acknowledges UGC, India for UGC-BSR Research Start-up grant.

## References

- Ahmed, M., Fahad, S., Ali, M.A., Hussain, S., Tariq, M., Ilyas, F., Ahmad, S., Saud, S., Hammad, H.M., Nasim, W., Wu, C., 2021. Hydrogen sulfide: a novel gaseous molecule for plant adaptation to stress. *Journal of Plant Growth Regulation*. 1-17.
- Arif, Y., Hayat, S., Yusuf, M., Bajguz, A., 2021. Hydrogen sulfide: A versatile gaseous molecule in plants. *Plant Physiology and Biochemistry*. 158, 372-384.

- 373 Armenteros, J.J.A., Sønderby, C.K., Sønderby, S.K., Nielsen, H., Winther, O., 2017. DeepLoc: prediction of  
374 protein subcellular localization using deep learning. *Bioinformatics*. 33(21), 3387-3395.
- 375 Armenteros, J.J.A., Salvatore, M., Emanuelsson, O., Winther, O., Von Heijne, G., Elofsson, A., Nielsen, H.,  
376 2019a Detecting sequence signals in targeting peptides using deep learning. *Life science alliance*. 2, 5.
- 377 Armenteros, J.J.A., Tsirigos, K.D., Sønderby, C.K., Petersen, T.N., Winther, O., Brunak, S., von Heijne, G.,  
378 Nielsen, H., 2019b. SignalP 5.0 improves signal peptide predictions using deep neural networks. *Nature*  
379 *biotechnology*. 37(4), 420-423.
- 380 Aroca, A., Benito, J.M., Gotor, C., Romero, L.C., 2017. Persulfidation proteome reveals the regulation of protein  
381 function by hydrogen sulfide in diverse biological processes in *Arabidopsis*. *Journal of Experimental*  
382 *Botany*. 68(17), 4915-4927.
- 383 Aroca, A., Gotor, C., Romero, L.C., 2018. Hydrogen sulfide signaling in plants: emerging roles of protein  
384 persulfidation. *Frontiers in Plant Science*. 9, 1369.
- 385 Aroca, Á., Serna, A., Gotor, C., Romero, L.C., 2015. S-sulphydration: a cysteine posttranslational modification in  
386 plant systems. *Plant Physiology*. 168(1), 334-342.
- 387 Beinert, H., 2000. A tribute to sulfur. *European Journal of Biochemistry*. 267(18), 5657-5664.
- 388 Birke, H., De Kok, L.J., Wirtz, M., Hell, R., 2015. The role of compartment-specific cysteine synthesis for sulfur  
389 homeostasis during H<sub>2</sub>S exposure in *Arabidopsis*. *Plant and Cell Physiology*. 56(2), 358-367.
- 390 Brychkova G, Grishkevich V, Fluhr R, Sagi M (2013) An essential role for tomato sulfite oxidase and enzymes  
391 of the sulfite network in maintaining leaf sulfite homeostasis. *Plant physiology* 161(1): 148-164.
- 392 Brychkova G, Yarmolinsky D, Fluhr R, Sagi M (2012) The determination of sulfite levels and its oxidation in  
393 plant leaves. *Plant science* 190: 123-130.
- 394 Chen, J., Shang, Y.T., Wang, W.H., Chen, X.Y., He, E.M., Zheng, H.L., Shangguan, Z., 2016. Hydrogen  
395 sulfide-mediated polyamines and sugar changes are involved in hydrogen sulfide-induced drought tolerance in  
396 *Spinacia oleracea* seedlings. *Frontiers in Plant Science*. 7, 1173.
- 397 Corpas, F.J., 2019. Hydrogen sulfide: a new warrior against abiotic stress. *Trends in plant science* 24 (11), 983-  
398 988.
- 399 Corpas, F.J., Barroso, J.B., 2013. Nitrooxidative stress vs oxidative or nitrosative stress in higher plants. *New*  
400 *Phytologist*. 199(3), 633-635.
- 401 Corpas, F.J., Palma, J.M., 2020. H<sub>2</sub>S signaling in plants and applications in agriculture. *Journal of advanced*  
402 *research* 24, 131-137.
- 403 Corpas, F.J., Barroso, J.B., González-Gordo, S., Muñoz-Vargas, M.A., Palma, J.M., 2019. Hydrogen sulfide:  
404 A novel component in *Arabidopsis* peroxisomes which triggers catalase inhibition. *Journal of integrative plant*  
405 *biology* 61(7), 871-883.
- 406 Corpas, F.J., González-Gordo, S., Palma, J.M., 2020. Plant peroxisomes: A factory of reactive species. *Frontiers*  
407 *in Plant Science* 11, 853.
- 408 Corpas, F.J., González-Gordo, S., Cañas, A., Palma, J.M., 2019. Nitric oxide and hydrogen sulfide in plants:  
409 which comes first?. *Journal of Experimental Botany* 70(17), 4391-4404.

- 410 Ding, H., Ma, D., Huang, X., Hou, J., Wang, C., Xie, Y., Wang, Y., Qin, H., Guo, T., 2019. Exogenous  
411 hydrogen sulfide alleviates salt stress by improving antioxidant defenses and the salt overly sensitive pathway in  
412 wheat seedlings. *Acta Physiologiae Plantarum*, 41(7), 1-11.
- 413 Dooley, F.D., Wyllie-Echeverria, S., Roth, M.B., Ward, P.D., 2013 Tolerance and response of *Zostera marina*  
414 seedlings to hydrogen sulfide. *Aquatic Botany*. 105, 7-10.
- 415 Emanuelsson, O., Nielsen, H., Von, H., Heijne, G., 1999. ChloroP, a neural network-based method for predicting  
416 chloroplast transit peptides and their cleavage sites. *Protein Science*. 8(5), 978-984.
- 417 Filipovic, M.R., 2015. Persulfidation (S-sulfhydration) and H<sub>2</sub>S. *Chemistry, biochemistry and pharmacology of*  
418 *hydrogen sulfide*. 29-59.
- 419 Filipovic, M.R., Jovanović, V.M., 2017. More than just an intermediate: hydrogen sulfide signalling in  
420 plants. *Journal of experimental botany* 68 (17), 4733-4736.
- 421 Francois, J.A., Kumaran, S., Jez, J.M., 2006. Structural basis for interaction of O-acetylserine sulfhydrylase and  
422 serine acetyltransferase in the Arabidopsis cysteine synthase complex. *The Plant Cell*. 18(12), 3647-3655.
- 423 Fuentes-Lara, L.O., Medrano-Macías, J., Pérez-Labrada, F., Rivas-Martínez, E.N., García-Enciso, E.L.,  
424 González-Morales, S., Juárez-Maldonado, A., Rincón-Sánchez, F., Benavides-Mendoza, A., 2019. From  
425 elemental sulfur to hydrogen sulfide in agricultural soils and plants. *Molecules*. 24(12), 2282.
- 426 Gigolashvili, T., Kopriva, S., 2014. Transporters in plant sulfur metabolism. *Frontiers in Plant Science*, 5, 442.
- 427 Goldberg, T., Hecht, M., Hamp, T., Karl, T., Yachdav, G., Ahmed, N., Altermann, U., Angerer, P., Ansorge, S.,  
428 Balasz, K., Bernhofer, M., 2014. LocTree3 prediction of localization. *Nucleic acids research*. 42(W1), W350-  
429 W355.
- 430 González-Gordo, S., Palma, J.M., Corpas, F.J., 2020. Appraisal of H<sub>2</sub>S metabolism in *Arabidopsis thaliana*: In  
431 silico analysis at the subcellular level. *Plant Physiology and Biochemistry*. 155, 579-588.
- 432 Guo, H., Xiao, T., Zhou, H., Xie, Y., Shen, W., 2016. Hydrogen sulfide: a versatile regulator of environmental  
433 stress in plants. *Acta Physiologiae Plantarum*. 38(1), 16.
- 434 Hasanuzzaman, M., Nahar, K., Hossain, M.S., Anee, T.I., Parvin, K., Fujita, M., 2017. Nitric oxide pretreatment  
435 enhances antioxidant defense and glyoxalase systems to confer PEG-induced oxidative stress in  
436 rapeseed. *Journal of Plant Interactions*. 12(1), 323-331.
- 437 Horton, P., Park, K.J., Obayashi, T., Fujita, N., Harada, H., Adams-Collier, C.J., Nakai, K., 2007 WoLF PSORT:  
438 protein localization predictor. *Nucleic acids research*. 35 (suppl\_2), W585-W587.
- 439 Howe, E., Holton, K., Nair, S., Schlauch, D., Sinha, R., Quackenbush, J., 2010. Mev: multiexperiment viewer.  
440 In *Biomedical informatics for cancer research* (267-277). Springer, Boston, MA.
- 441 Hu, K.D., Zhang, X.Y., Yao, G.F., Rong, Y.L., Ding, C., Tang, J., Yang, F., Huang, Z.Q., Xu, Z.M., Chen, X.Y.,  
442 Li, Y.H., 2020. A nuclear-localized cysteine desulfhydrase plays a role in fruit ripening in tomato. *Horticulture*  
443 *research*. 7(1), 1-13.
- 444 Jin, Z., Pei, Y., 2015. Physiological implications of hydrogen sulfide in plants: pleasant exploration behind its  
445 unpleasant odour. *Oxidative Medicine and Cellular Longevity*. 397502. doi: 10.1155/2015/397502.
- 446 Kharbech, O., Houmani, H., Chaoui, A., Corpas, F.J., 2017 Alleviation of Cr (VI)-induced oxidative stress in  
447 maize (*Zea mays* L.) seedlings by NO and H<sub>2</sub>S donors through differential organ-dependent regulation of ROS  
448 and NADPH-recycling metabolisms. *Journal of Plant Physiology*. 219, 71-80.



- 449 Kharbech, O., Massoud, M.B., Sakouhi, L., Djebali, W., Mur, L.A.J., Chaoui, A., 2020. Exogenous application  
450 of hydrogen sulfide reduces chromium toxicity in maize seedlings by suppressing NADPH oxidase activities and  
451 methylglyoxal accumulation. *Plant Physiology and Biochemistry* 154, 646-656.
- 452 Li, L., Wang, Y., Shen, W., 2012. Roles of hydrogen sulfide and nitric oxide in the alleviation of cadmium-  
453 induced oxidative damage in alfalfa seedling roots. *Biometals*. 25(3), 617-631.
- 454 Li, Z.G., 2015. Analysis of some enzymes activities of hydrogen sulfide metabolism in plants. *Methods in*  
455 *enzymology* 555, 253-269.
- 456 Li, Z.G., Min, X., Zhou, Z.H., 2016. Hydrogen sulfide: a signal molecule in plant cross-adaptation. *Frontiers in*  
457 *plant science*. 7, 1621.
- 458 Liu, D., Li, J., Li, Z., Pei, Y., (2020) Hydrogen sulfide inhibits ethylene-induced petiole abscission in tomato  
459 (*Solanum lycopersicum* L.). *Horticulture research*. 7(1), 1-11.
- 460 Liu, D., Lu, J., Li, H., Wang, J., Pei, Y., 2019. Characterization of the O-acetylserine (thiol) lyase gene family in  
461 *Solanum lycopersicum* L. *Plant molecular biology*. 99(1-2), 123-134.
- 462 Liu, H., Wang, J., Liu, J., Liu, T., Xue, S., 2021. Hydrogen sulfide (H<sub>2</sub>S) signaling in plant development and  
463 stress responses. *Abiotech*.1-32.
- 464 Mishra, S., Bhardwaj, M., Mehrotra, S., Chowdhary, A.A., Srivastava, V., 2020. The Contribution of  
465 Phytohormones in Plant Thermotolerance. *Heat Stress Tolerance in Plants: Physiological, Molecular and Genetic*  
466 *Perspectives* pp.213-238.
- 467 Mishra, S., Srivastava, V., Mehrotra, S., Quadri, S.N., 2017. The Regulation of Plant Development: Cross-talk  
468 of Reactive Oxygen Species and Plant Hormones. *Reactive Oxygen Species in Plants: Boon or Bane: Revisiting*  
469 *the Role of ROS*. 80-90.
- 470 Mostofa, M.G., Saegusa, D., Fujita, M., Tran, L.S.P., 2015. Hydrogen sulfide regulates salt tolerance in rice by  
471 maintaining Na<sup>+</sup>/K<sup>+</sup> balance, mineral homeostasis and oxidative metabolism under excessive salt  
472 stress. *Frontiers in plant science* 6, 1055.
- 473 Münchberg, U., Anwar, A., Mecklenburg, S., Jacob, C., 2007. Polysulfides as biologically active ingredients of  
474 garlic. *Organic & biomolecular chemistry*. 5(10), 1505-1518.
- 475 Muñoz-Vargas, M.A., González-Gordo, S., Cañas, A., López-Jaramillo, J., Palma, J.M., Corpas, F.J., 2018.  
476 Endogenous hydrogen sulfide (H<sub>2</sub>S) is up-regulated during sweet pepper (*Capsicum annuum* L.) fruit ripening.  
477 In vitro analysis shows that NADP-dependent isocitrate dehydrogenase (ICDH) activity is inhibited by H<sub>2</sub>S and  
478 NO. *Nitric Oxide*. 81, 36-45.
- 479 Muñoz-Vargas, M.A., González-Gordo, S., Palma, J.M., Corpas, F.J., 2020. Inhibition of NADP-malic  
480 enzyme activity by H<sub>2</sub>S and NO in sweet pepper (*Capsicum annuum* L.) fruits. *Physiologia plantarum*. 168(2),  
481 278-288.
- 482 Noctor, G., Mhamdi, A., Chaouch, S., Han, Y.I., Neukermans, J., Marquez-Garcia, B.E.L.E.N., Queval, G.,  
483 Foyer, C.H., 2012. Glutathione in plants: an integrated overview. *Plant, cell & environment*. 35(2), 454-484.
- 484 Pan, D.Y., Fu, X., Zhang, X.W., Liu, F.J., Bi, H.G., Ai, X.Z., 2020. Hydrogen sulfide is required for salicylic  
485 acid-induced chilling tolerance of cucumber seedlings. *Protoplasma*. 257(6), 1543-1557.
- 486 Park, C.M., Weerasinghe, L., Day, J.J., Fukuto, J.M., Xian, M., 2015. Persulfides: current knowledge and  
487 challenges in chemistry and chemical biology. *Molecular BioSystems*. 11(7), 1775-1785.

- 488 Pivato, M., Fabrega-Prats, M., Masi, A., 2014. Low-molecular-weight thiols in plants: Functional and analytical  
489 implications. *Archives of biochemistry and biophysics*. 560, 83-99.
- 490 Queval, G., Thominet, D., Vanacker, H., Miginiac-Maslow, M., Gakière, B., Noctor, G., 2009. H<sub>2</sub>O<sub>2</sub>-activated  
491 up-regulation of glutathione in Arabidopsis involves induction of genes encoding enzymes involved in cysteine  
492 synthesis in the chloroplast. *Molecular Plant*. 2(2), 344-356.
- 493 Rosli, H.G., Zheng, Y., Pombo, M.A., Zhong, S., Bombarely, A., Fei, Z., Collmer, A., Martin, G.B., 2013  
494 Transcriptomics-based screen for genes induced by flagellin and repressed by pathogen effectors identifies a cell  
495 wall-associated kinase involved in plant immunity. *Genome biology*. 14(12), 1-15.
- 496 Sahu, S.S., Loaiza, C.D., Kaundal, R., 2020. Plant-mSubP: a computational framework for the prediction of  
497 single-and multi-target protein subcellular localization using integrated machine-learning approaches. *AoB*  
498 *Plants*. 12(3) 068.
- 499 Savojardo, C., Bruciaferri, N., Tartari, G., Martelli, P.L., Casadio, R., 2020. DeepMito: accurate prediction of  
500 protein sub-mitochondrial localization using convolutional neural networks. *Bioinformatics*. 36(1), 56-64.
- 501 Savojardo, C., Martelli, P.L., Fariselli, P., Casadio, R., 2018. DeepSig: deep learning improves signal peptide  
502 detection in proteins. *Bioinformatics*. 34(10), 1690-1696.
- 503 Savojardo, C., Martelli, P.L., Fariselli, P., Profiti, G., Casadio, R., 2018. BUSCA: an integrative web server to  
504 predict subcellular localization of proteins. *Nucleic acids research*. 46 (W1), W459-W466.
- 505 Shen, J., Zhang, J., Zhou, M., Zhou, H., Cui, B., Gotor, C., Romero, L.C., Fu, L., Yang, J., Foyer, C.H., Pan, Q.,  
506 2020. Persulfidation-based modification of cysteine desulfhydrase and the NADPH oxidase RBOHD controls  
507 guard cell abscisic acid signaling. *The Plant Cell*. 32(4), 1000-1017.
- 508 Sperschneider, J., Catanzariti, A.M., DeBoer, K., Petre, B., Gardiner, D.M., Singh, K.B., Dodds, P.N., Taylor,  
509 J.M., 2017. LOCALIZER: subcellular localization prediction of both plant and effector proteins in the plant  
510 cell. *Scientific reports*. 7(1), 1-14.
- 511 Srivastava, V., Mishra, S., Chowdhary, A.A., Lhamo, S., Mehrotra, S., 2021 The  $\gamma$ -Aminobutyric Acid  
512 (GABA) Towards Abiotic Stress Tolerance. In *Compatible Solutes Engineering for Crop Plants Facing Climate*  
513 *Change* (Eds. S.H. Wani et al.), [https://doi.org/10.1007/978-3-030-80674-3\\_7](https://doi.org/10.1007/978-3-030-80674-3_7)
- 514 Szklarczyk, D., Gable, A.L., Lyon, D., Junge, A., Wyder, S., Huerta-Cepas, J., Simonovic, M., Doncheva, N.T.,  
515 Morris, J.H., Bork, P., Jensen, L.J., 2019. STRING v11: protein-protein association networks with increased  
516 coverage, supporting functional discovery in genome-wide experimental datasets. *Nucleic acids research*.  
517 47(D1):D607-D613.
- 518 Takahashi, H., Kopriva, S., Giordano, M., Saito, K., Hell, R., 2011. Sulfur assimilation in photosynthetic  
519 organisms: molecular functions and regulations of transporters and assimilatory enzymes. *Annual review of plant*  
520 *biology*. 62, 157-184.
- 521 Vojtovič, D., Luhová, L., Petřivalský, M., 2020. Something smells bad to plant pathogens: Production of  
522 hydrogen sulfide in plants and its role in plant defence responses. *Journal of Advanced Research*. 27, 199-209
- 523 Xiao, Y., Wu, X., Sun, M., Peng, F., 2020. Hydrogen sulfide alleviates waterlogging-induced damage in peach  
524 seedlings via enhancing antioxidative system and inhibiting ethylene synthesis. *Frontiers in plant science*. 11:  
525 696.
- 526 Yamaguchi, C., Khamsalath, S., Takimoto, Y., Suyama, A., Mori, Y., Ohkama-Ohtsu, N., Maruyama-Nakashita,  
527 A., 2020. SLIM1 transcription factor promotes sulfate uptake and distribution to shoot, along with phytochelatins  
528 accumulation, under cadmium stress in Arabidopsis thaliana. *Plants*. 9(2), 163.

529 Yamaguchi, Y., Nakamura, T., Kusano, T., Sano, H., 2000. Three Arabidopsis genes encoding proteins with  
530 differential activities for cysteine synthase and  $\beta$ -cyanoalanine synthase. *Plant and Cell Physiology*. 41(4), 465-  
531 476.

532 Zhou, H., Chen, Y., Zhai, F., Zhang, J., Zhang, F., Yuan, X., Xie, Y., 2020. Hydrogen sulfide promotes rice  
533 drought tolerance via reestablishing redox homeostasis and activation of ABA biosynthesis and signaling. *Plant*  
534 *Physiology and Biochemistry*. 155, 213-220.

535 Zhou, Z.H., Wang, Y., Ye, X.Y., Li, Z.G., 2018. Signaling molecule hydrogen sulfide improves seed  
536 germination and seedling growth of maize (*Zea mays L.*) under high temperature by inducing antioxidant system  
537 and osmolyte biosynthesis. *Frontiers in plant science*. 9,1288.

538

539

540

541

542

543

544

545

546

547

548

549

550

551

552

553

554

555

556

557

558

559

## Figure and Table Legends

**Figure. 1. Working model for H<sub>2</sub>S metabolism in *S. lycopersicum*-** Enzymatic reactions involved in H<sub>2</sub>S metabolism via cysteine (Cys) metabolism at different subcellular localization including cytosol, chloroplast, and mitochondrion in *S. lycopersicum*. SULTR, sulfate transporters; APS, ATP sulfurylase; APR, adenylylsulfate reductase. The enzymes in green and red box are identified in present study. The reactions need further confirmation is marked as question. Refer tables 1 and 2 and 3 to find the meaning of each abbreviation.

**Figure. 2. Protein-protein interaction (PPI) network of components involved in H<sub>2</sub>S metabolism in *S. lycopersicum*-** Network nodes (circles) represent proteins and colored lines represent the types of interaction evidences used to predict the associations viz green line (indicates neighborhood evidence), blue line (indicates co-occurrence evidence), pink line (indicates experimental evidence), dark yellow line (indicates text-mining evidence), light blue line (indicates database evidence), black line (indicates co-expression evidence), purple line (indicates protein homology evidence). PPI Networks were done with STRING v11 (Szklarczyk et al., 2019). Refer tables 1 and 2 and 3 to find the meaning of each acronym.

**Figure. 3. Heatmap representation for in silico expression-** Relative expression analysis of the genes encoding enzymes related to H<sub>2</sub>S production and consumption, localized in cytosol, chloroplast and mitochondria of *S. lycopersicum*: (A) Development (B) Biotic stress- PAMP and bacterial treatment. Expression was visualized using heat maps by MeV (Howe et al., 2010). Blocks with colors indicate decreased (blue) or increased (yellow) transcript accumulation relative to the respective control. The bar at the top of the heat map represents relative expression values. The numbers below the bar indicate the log-transformed fold change. Refer tables 1 and 2 and 3 to find the meaning of each abbreviation.

**Table 1** Cytosolic enzymes involved in H<sub>2</sub>S metabolism in *S. lycopersicum*.

**Table 2** Chloroplastic enzymes involved in H<sub>2</sub>S metabolism in *S. lycopersicum*.

**Table 3** Mitochondrial enzymes involved in H<sub>2</sub>S metabolism in *S. lycopersicum*.

**Table S1** The sub-cellular localization prediction of tomato proteins related to H<sub>2</sub>S metabolism.

Table 1 Cytosolic enzymes involved in H<sub>2</sub>S metabolism in *Solanum lycopersicum*.

| S.No. | Protein ID<br>(Solgenomics) | Name of the Protein                                    | Acronym | Closest Ortholog<br>in Arabidopsis |
|-------|-----------------------------|--------------------------------------------------------|---------|------------------------------------|
| 1     | <i>Solyc01g068160.4.1</i>   | L-cysteine desulfhydrase                               | SILCD1  | AT3G62130.2                        |
| 2     | <i>Solyc01g097920.3.1</i>   | Cysteine synthase / O-acetyl-l-serine(thiol)lyase      | SIOAS1  | AT4G14880.5                        |
| 3     | Solyc01g097930.3.1          | Cysteine synthase-like / O-acetyl-l-serine(thiol)lyase | SIOAS2  | AT4G14880.5                        |
| 4     | Solyc01g097940.1.1          | Cysteine synthase-like / O-acetyl-l-serine(thiol)lyase | SIOAS3  | AT2G43750.2                        |
| 5     | Solyc01g097950.3.1          | Cysteine synthase / O-acetyl-l-serine(thiol)lyase      | SIOAS4  | AT4G14880.5                        |
| 6     | Solyc05g007590.4.1          | L-cysteine desulfhydrase                               | SILCD2  | AT5G26600.2                        |
| 7     | Solyc07g065470.4.1          | Cysteine synthase / O-acetyl-l-serine(thiol)lyase      | SIOAS9  | AT1G55880.1                        |
| 8     | Solyc09g082060.3.1          | Cysteine synthase / O-acetyl-l-serine(thiol)lyase      | SIOAS6  | AT4G14880.5                        |
| 9     | Solyc09g092430.3.1          | Selenium-binding protein                               | SISBP1  | AT4G14040.1                        |



Table 2 Chloroplastic enzymes involved in H<sub>2</sub>S metabolism in *Solanum lycopersicum*.

| S.No. | Protein ID<br>(Solgenomics) | Name of the Protein                                   | Acronym | Closest Ortholog<br>in Arabidopsis |
|-------|-----------------------------|-------------------------------------------------------|---------|------------------------------------|
| 1     | Solyc02g067180.3.1          | Cystathionine gamma<br>synthase                       | SICGS1  | AT3G01120.1                        |
| 2     | Solyc02g078990.4.1          | Thiosulfate<br>sulfurtransferase                      | SIMST1  | AT1G79230.1                        |
| 3     | Solyc03g098230.3.1          | D-cysteine desulhydrase                               | SIDCD2  | AT1G48420.3                        |
| 4     | Solyc05g055000.4.1          | Cysteine desulfurase                                  | SINFS2  | AT1G08490.1                        |
| 5     | Solyc06g009850.3.1          | Thiosulfate<br>sulfurtransferase                      | SIMST2  | AT1G79230.1                        |
| 6     | Solyc07g054540.4.1          | Lipoyl synthase                                       | SILIP1  | AT2G20860.3                        |
| 7     | Solyc07g066580.3.1          | Mercaptopyruvate<br>sulfurtransferase-like<br>protein | SIMST4  | AT1G79230.1                        |
| 8     | Solyc08g014340.3.1          | Cysteine synthase / O-<br>acetyl-l-serine(thiol)lyase | SIOAS5  | AT3G59760.3                        |
| 9     | Solyc08g066620.3.1          | Cystathionine beta-lyase                              | SICBL2  | AT3G57050.3                        |
| 10    | Solyc10g079720.2.1          | Cystathionine beta-lyase                              | SICBL3  | AT3G57050.1                        |
| 11    | Solyc11g065620.2.1          | Sulfite reductase                                     | SISiR1  | AT5G04590.1                        |

|    |                    |                 |        |             |
|----|--------------------|-----------------|--------|-------------|
| 12 | Solyc12g099700.3.1 | Lipoyl synthase | SILIP3 | AT5G08415.1 |
|----|--------------------|-----------------|--------|-------------|

Table 3 Mitochondrial enzymes involved in H<sub>2</sub>S metabolism in *Solanum lycopersicum*.

| S.No. | Protein ID<br>(Solgenomics) | Name of the Protein                                                                      | Acronym | Closest<br>Ortholog in<br>Arabidopsis |
|-------|-----------------------------|------------------------------------------------------------------------------------------|---------|---------------------------------------|
| 1     | Solyc01g008900.4.1          | D-cysteine desulphydrase                                                                 | SIDCD1  | AT3G26115.1                           |
| 2     | Solyc01g094790.3.1          | Cysteine synthase / O-acetyl-l-serine(thiol)lyase                                        | SIOAS7  | AT3G61440.1                           |
| 3     | Solyc02g091900.4.1          | Cysteine desulfurase                                                                     | SINFS1  | AT5G65720.2                           |
| 4     | Solyc08g068440.4.1          | Lipoyl synthase                                                                          | SILIP2  | AT2G20860.3                           |
| 5     | Solyc10g012370.3.1          | Bifunctional L-3-cyanoalanine synthase/cysteine synthase / O-acetyl-l-serine(thiol)lyase | SIOAS8  | AT3G61440.1                           |

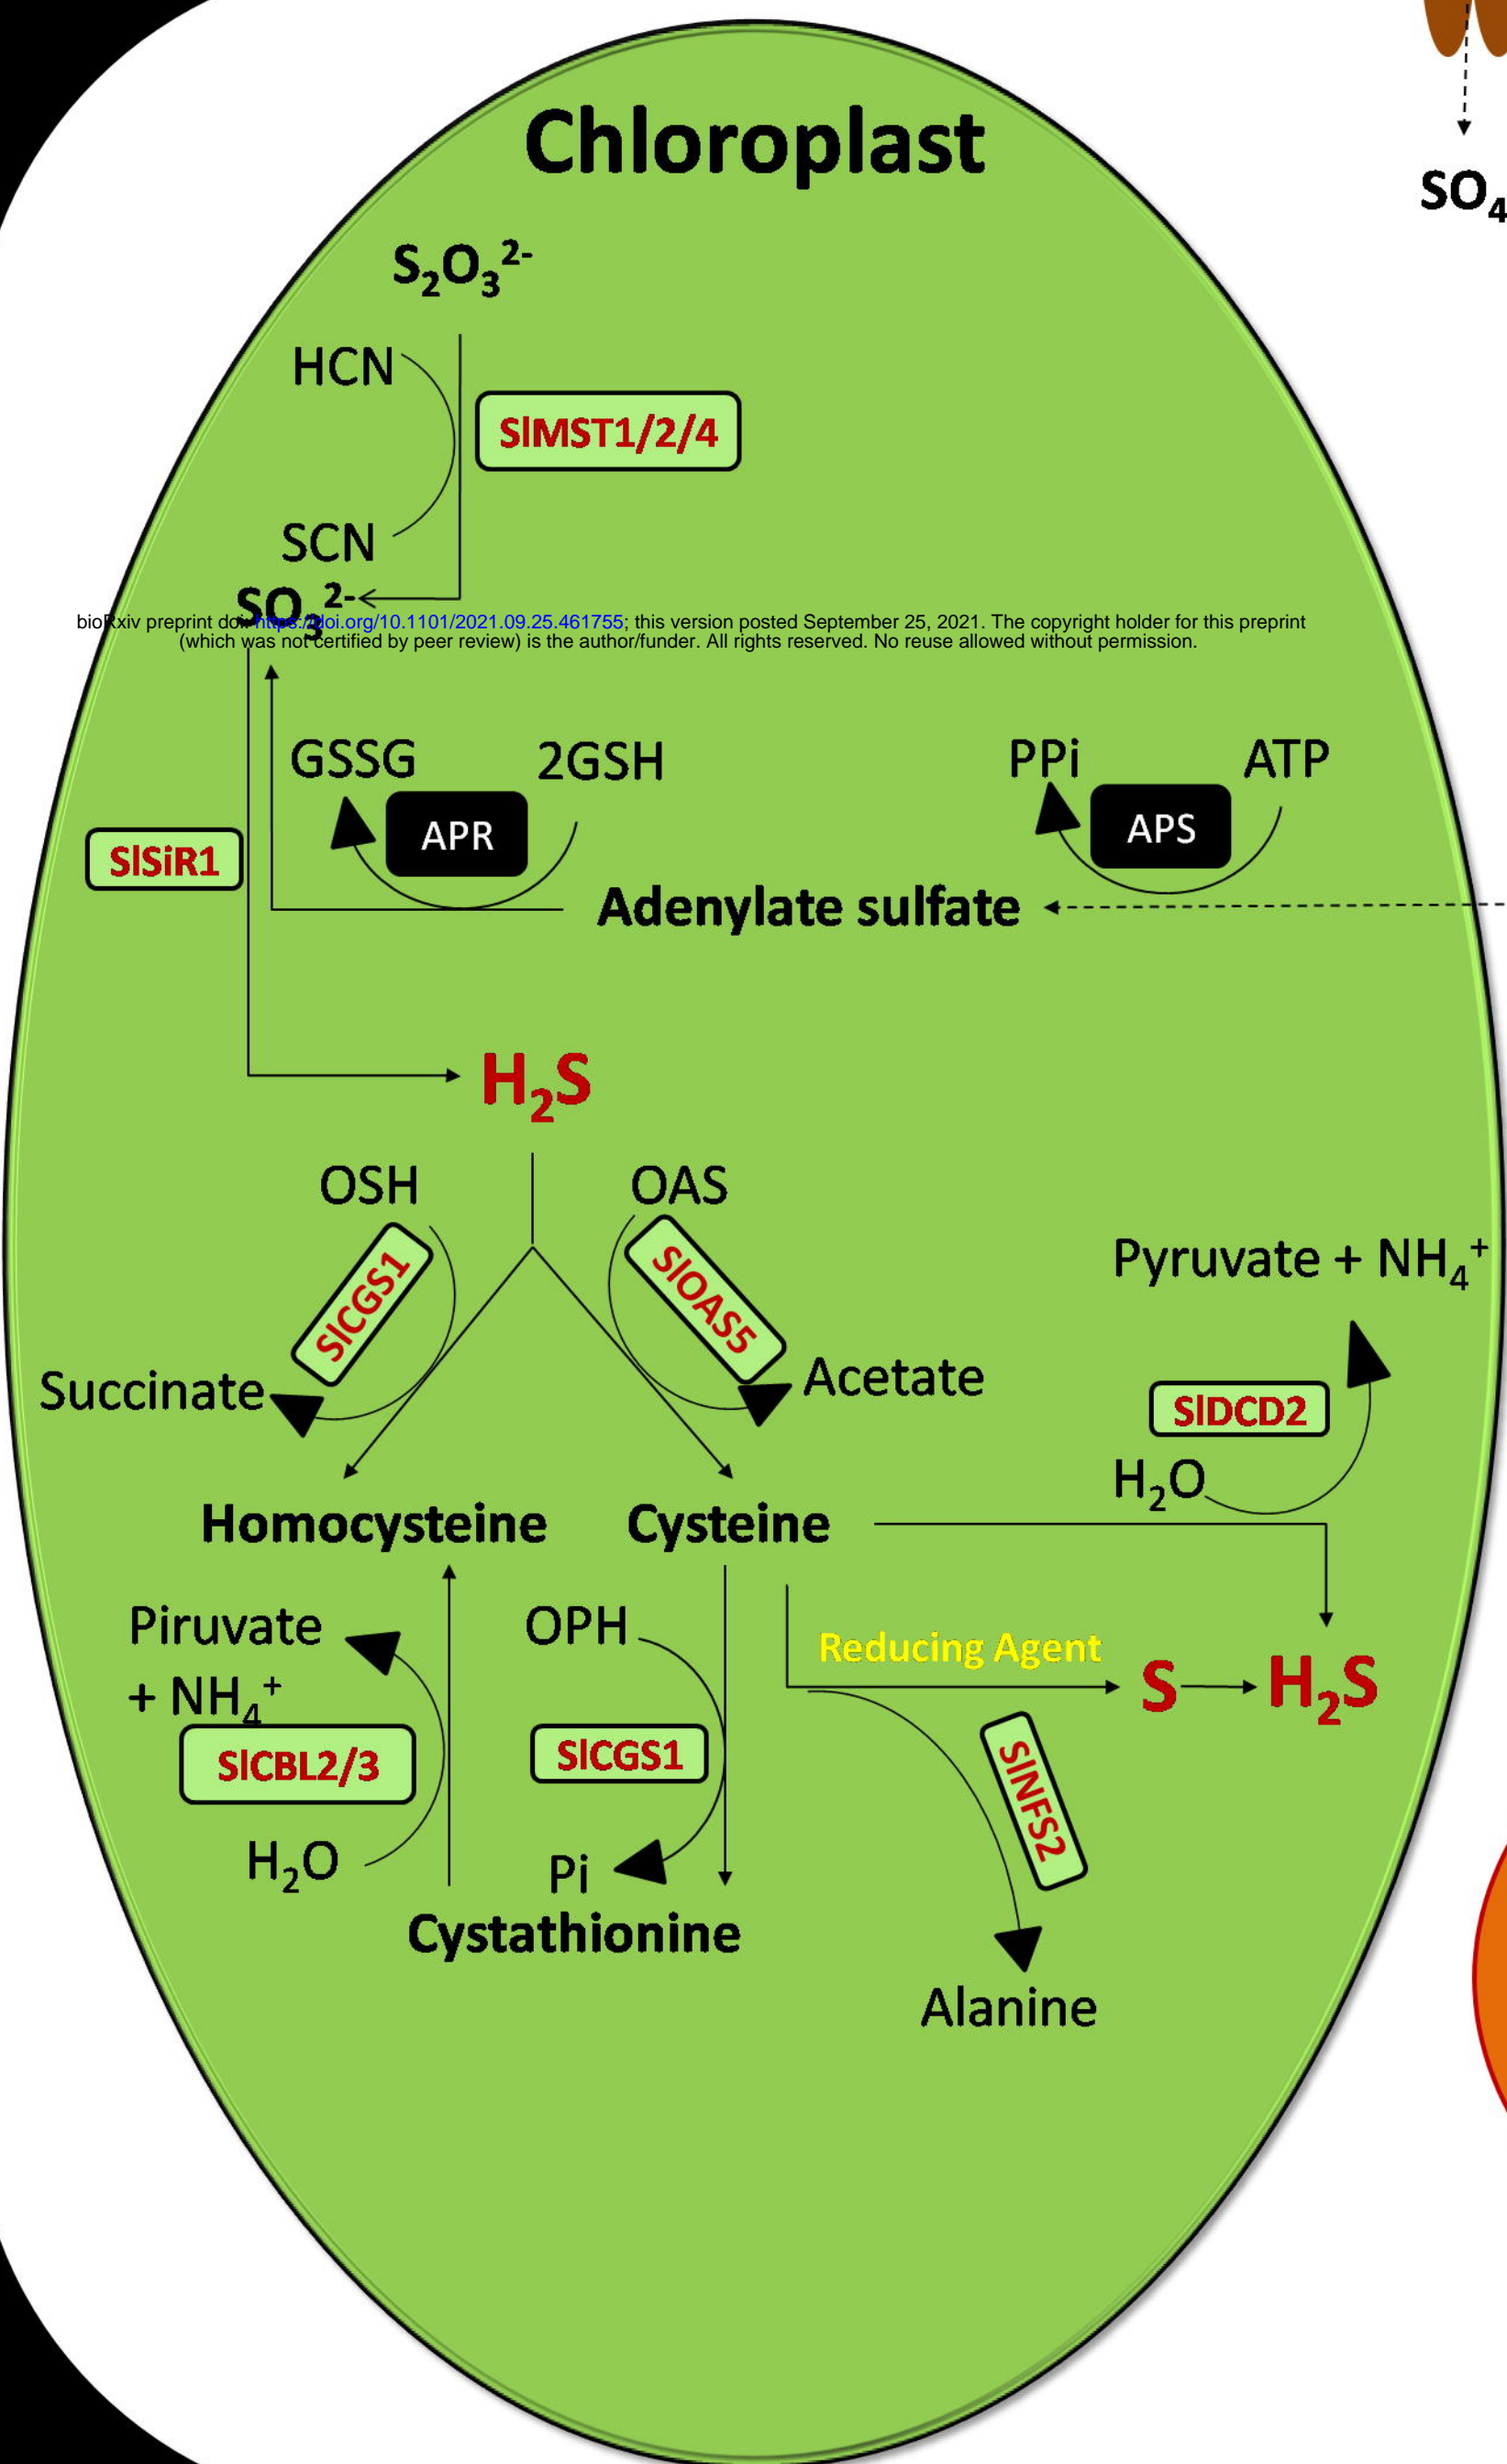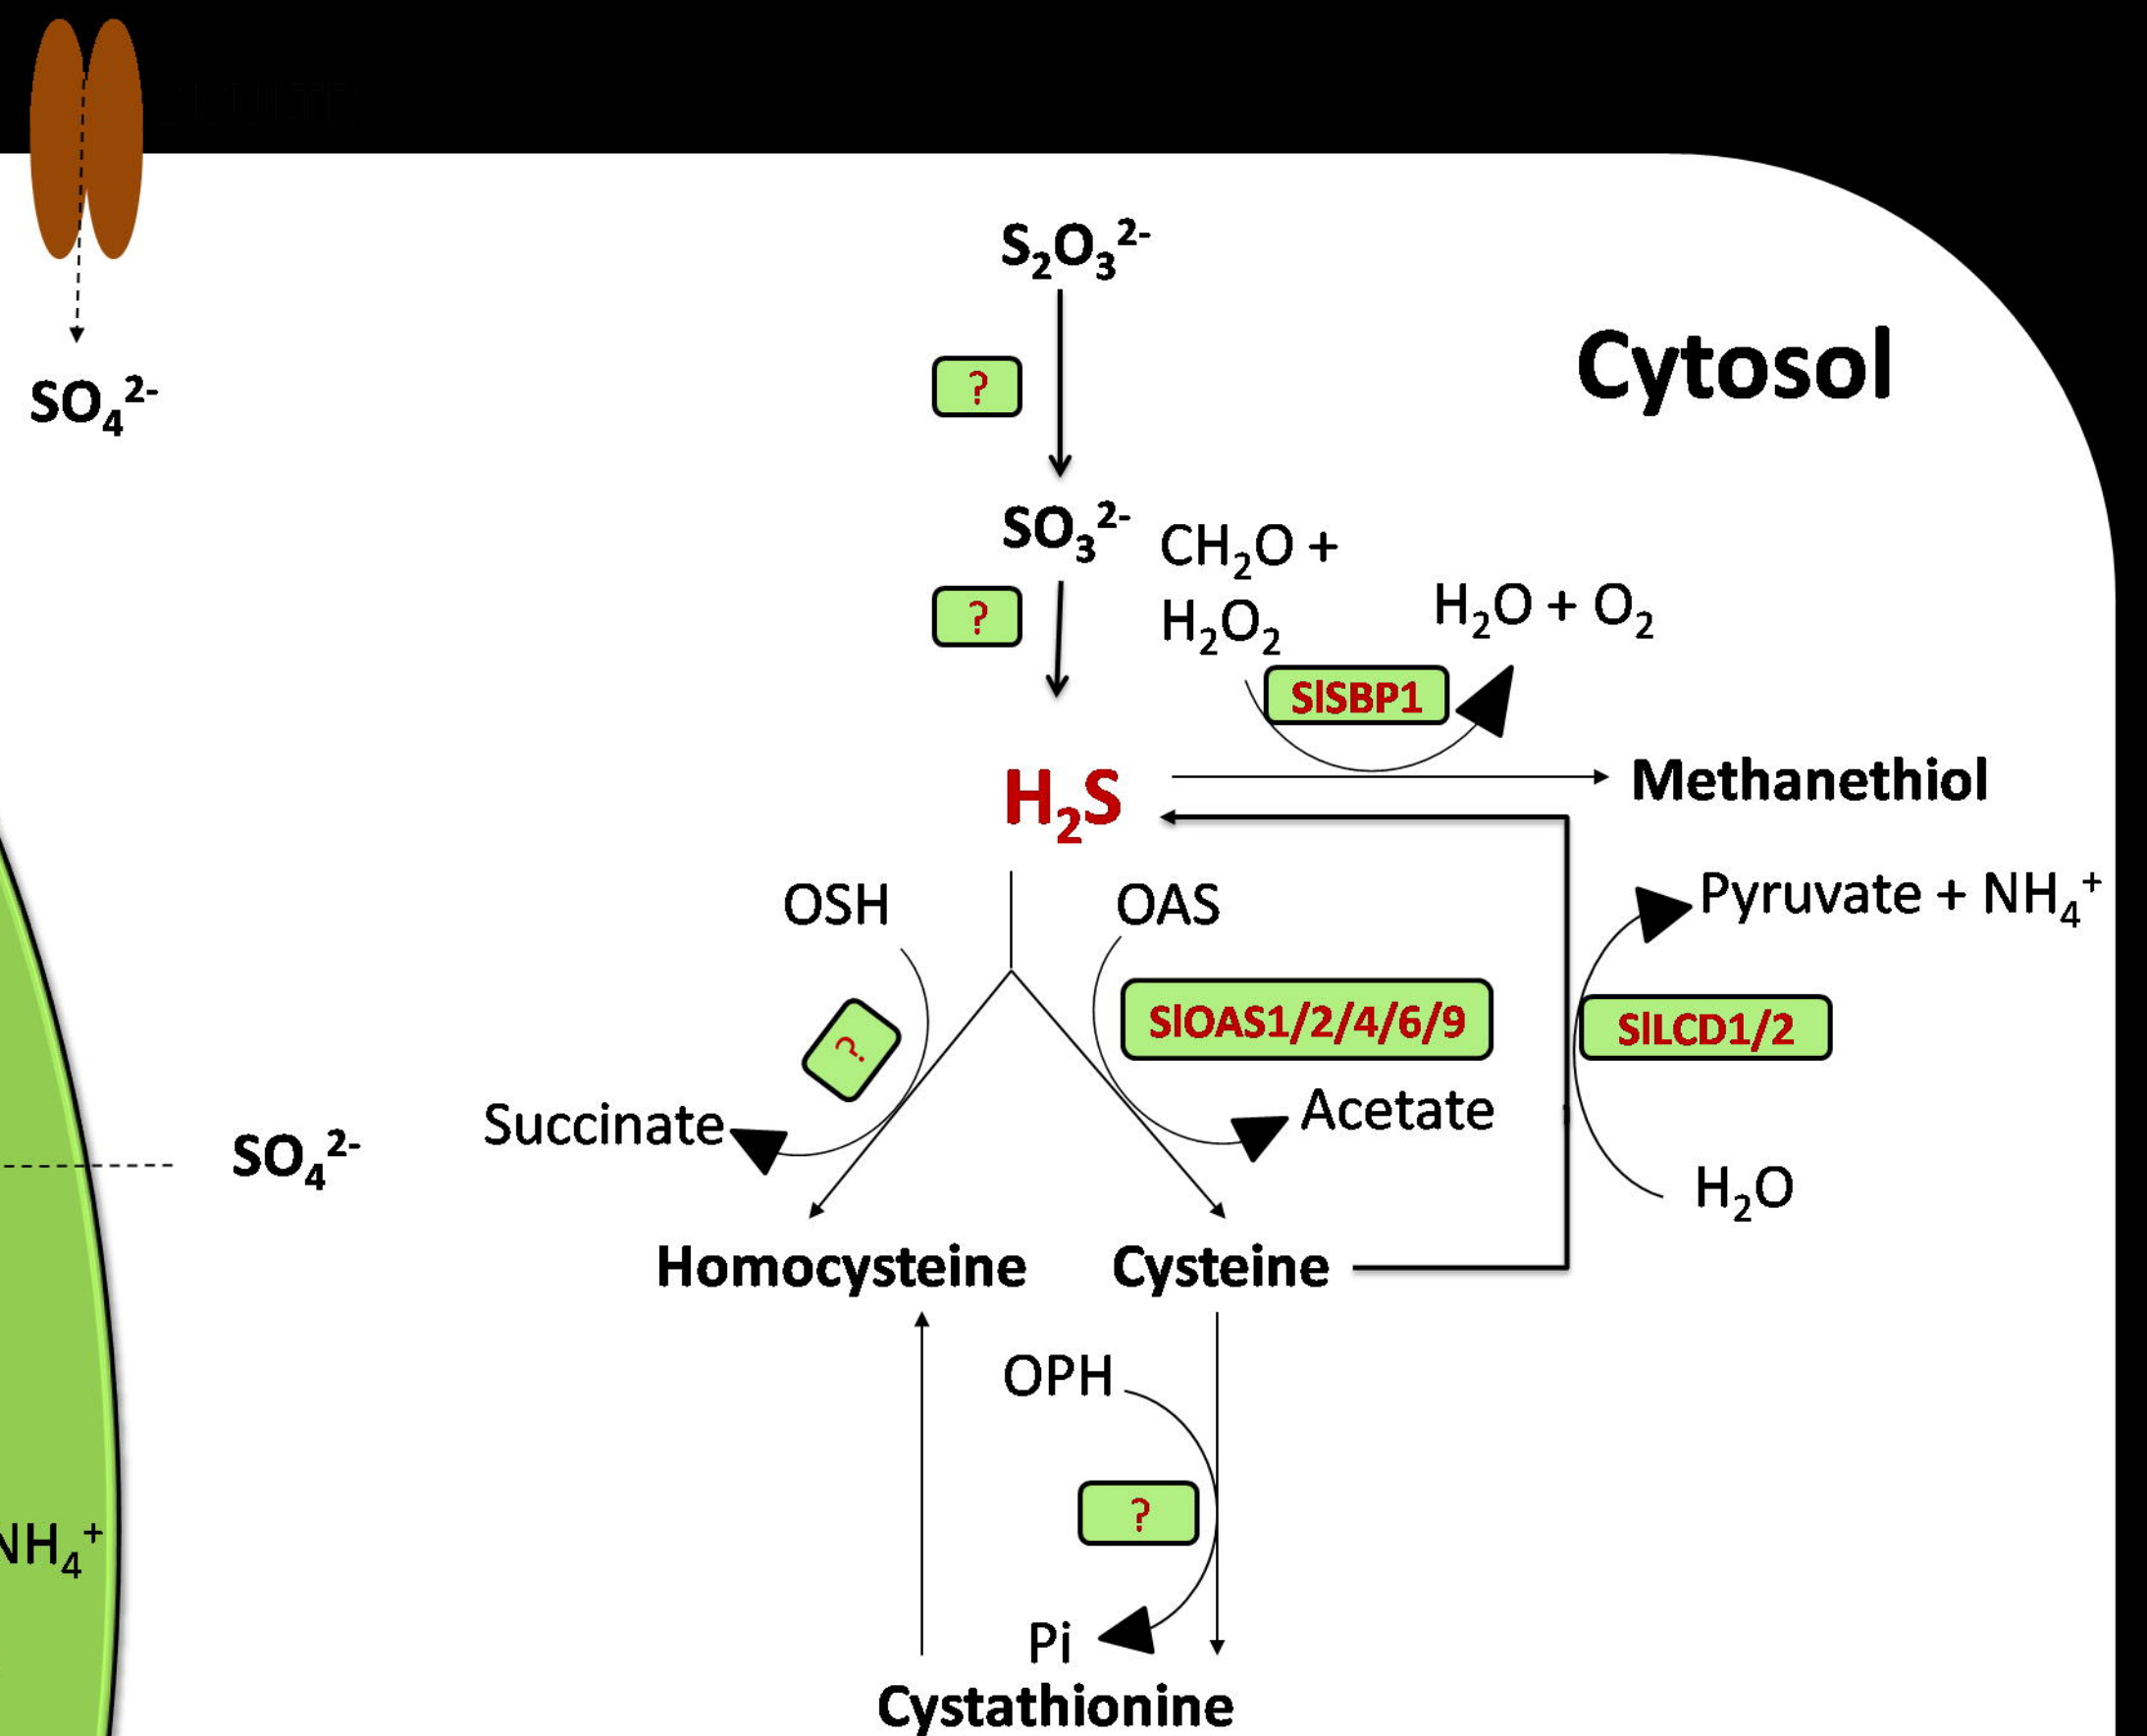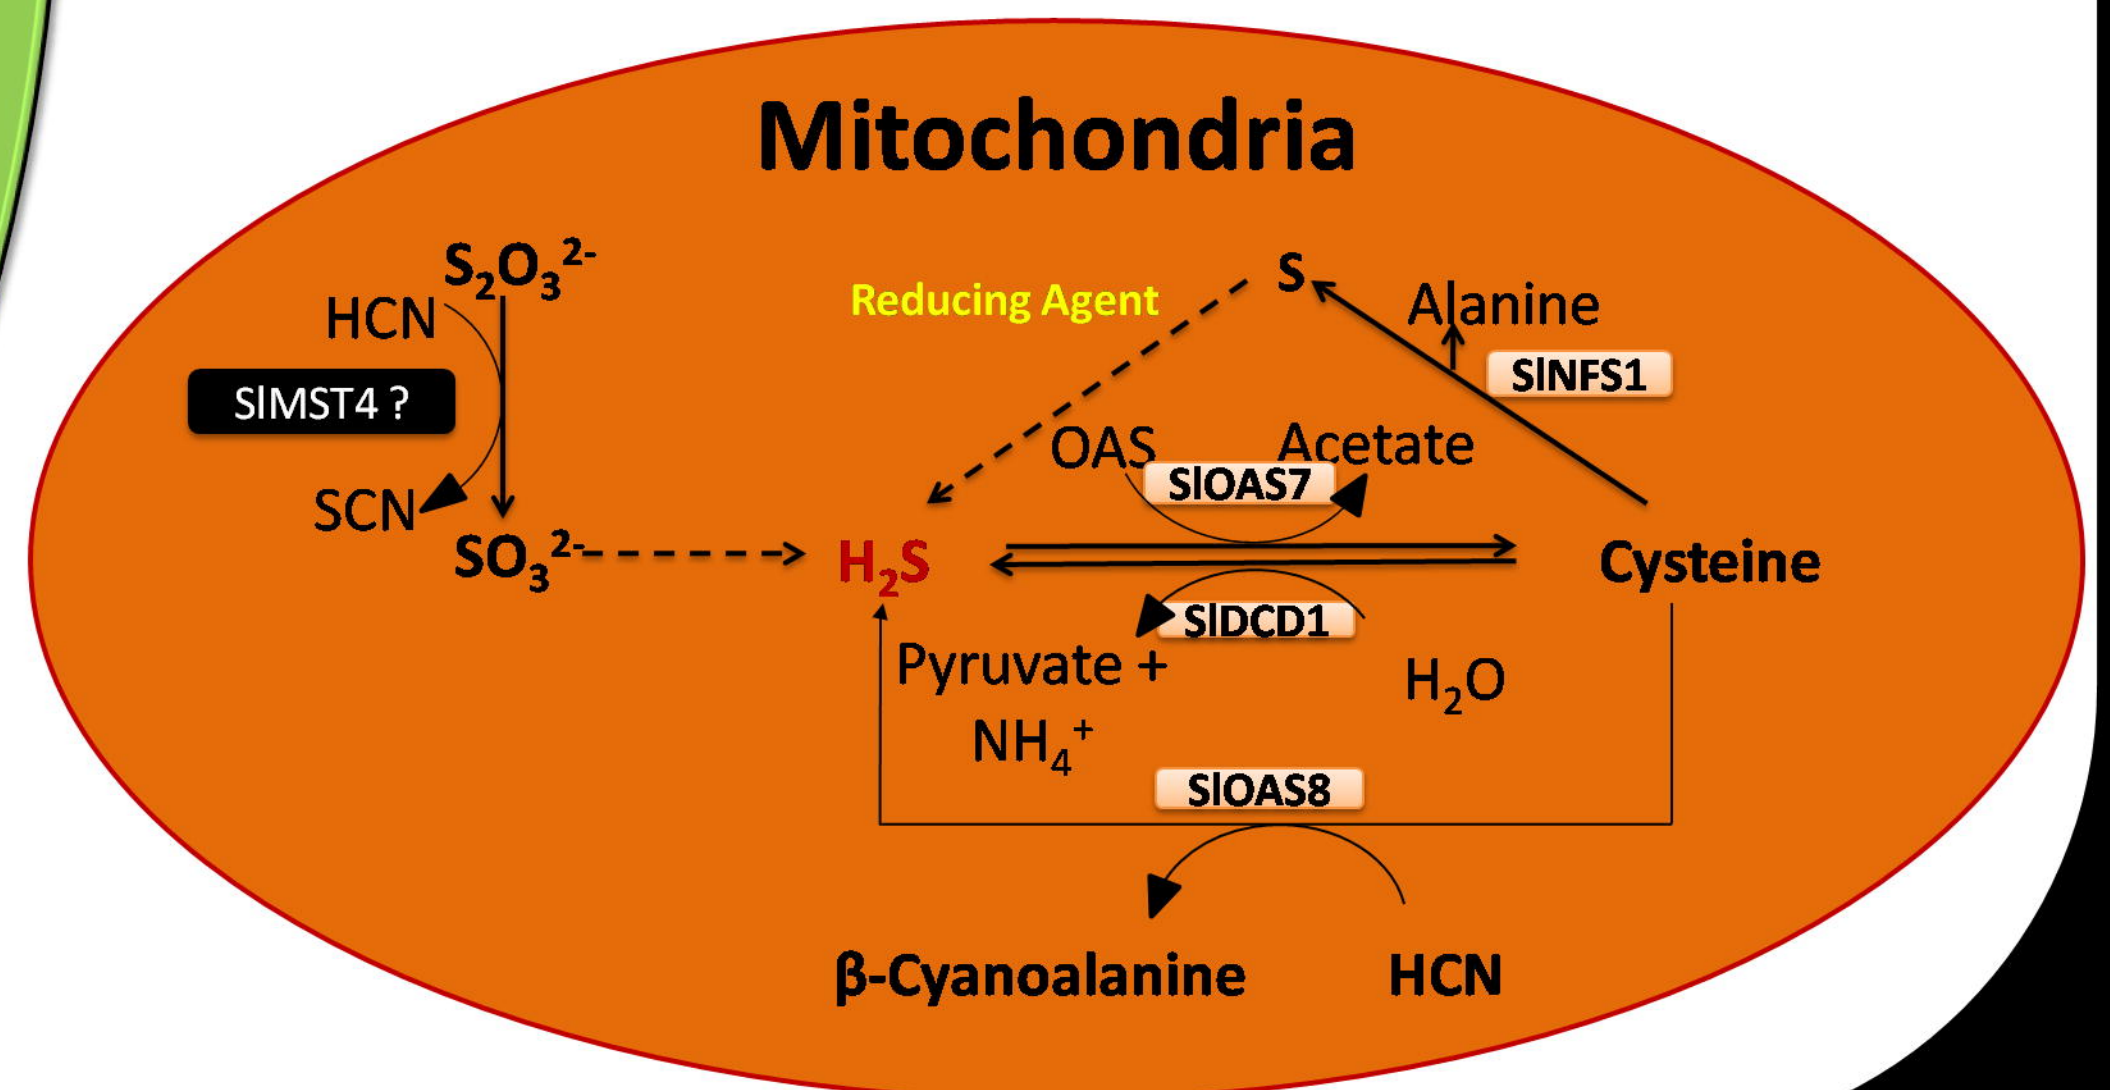



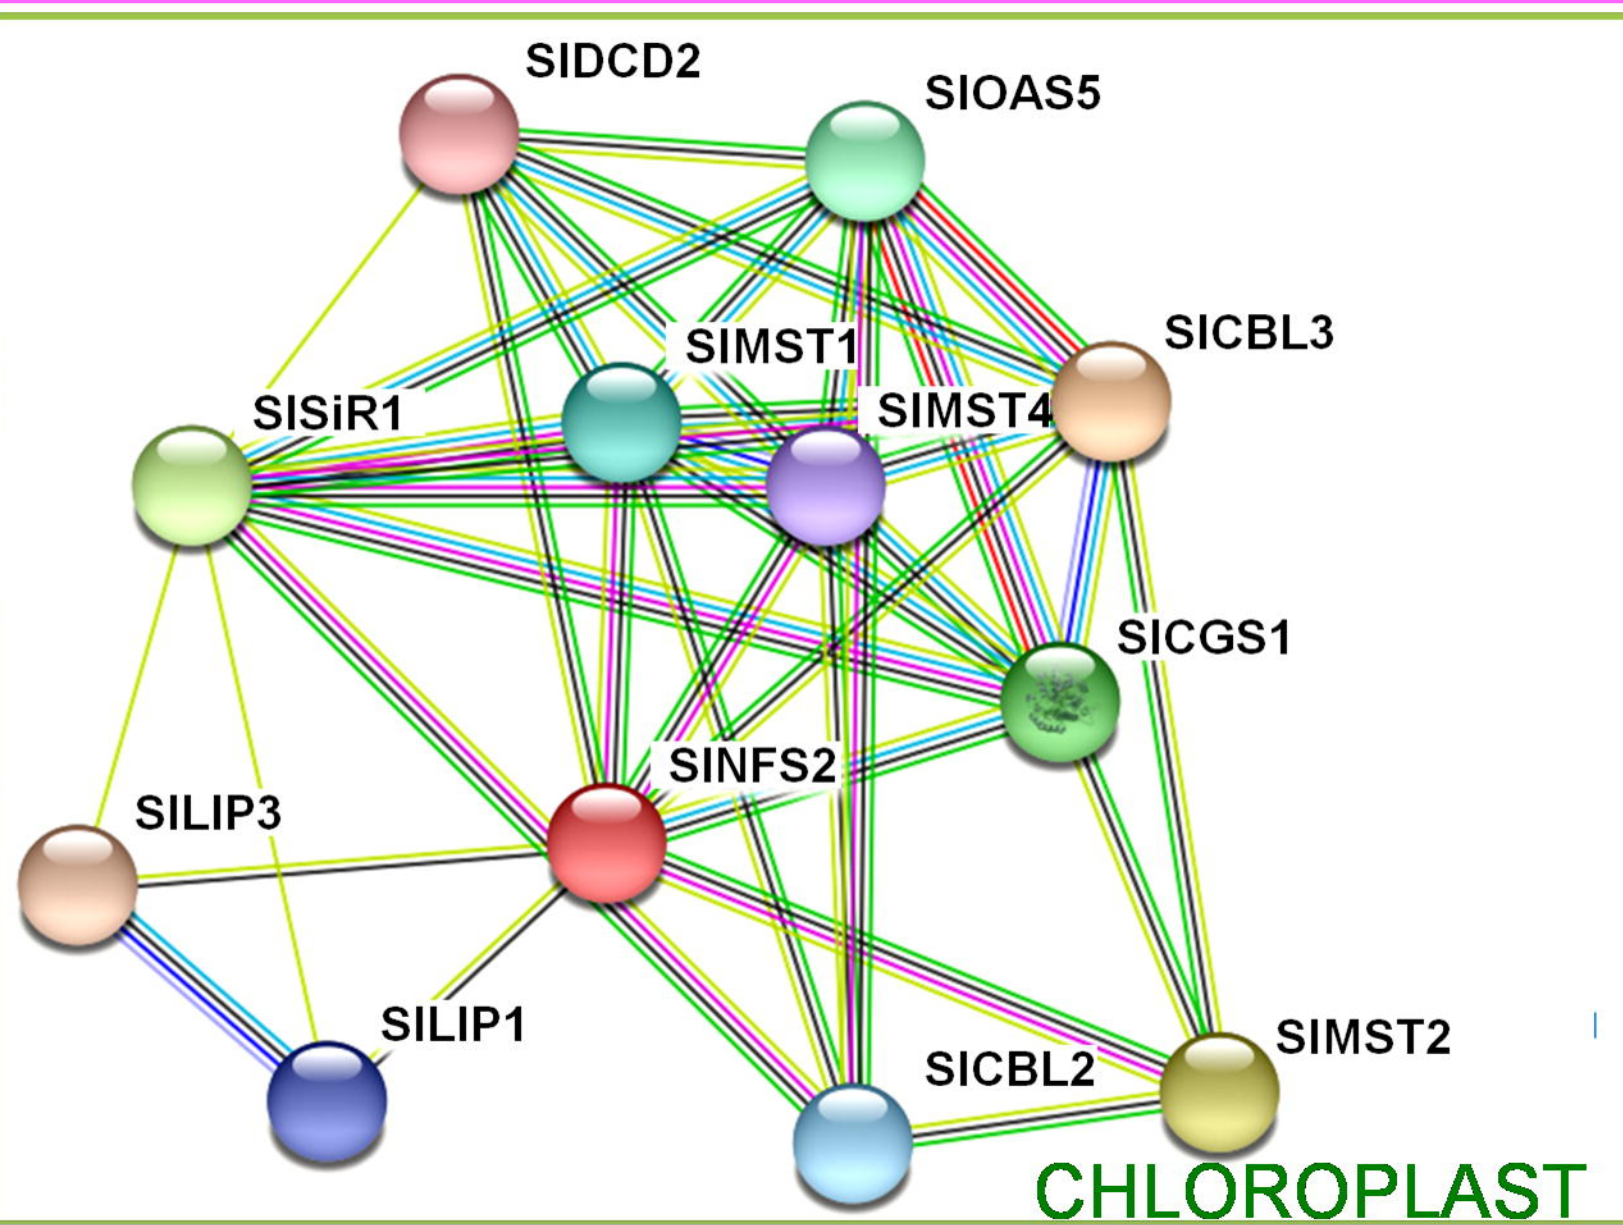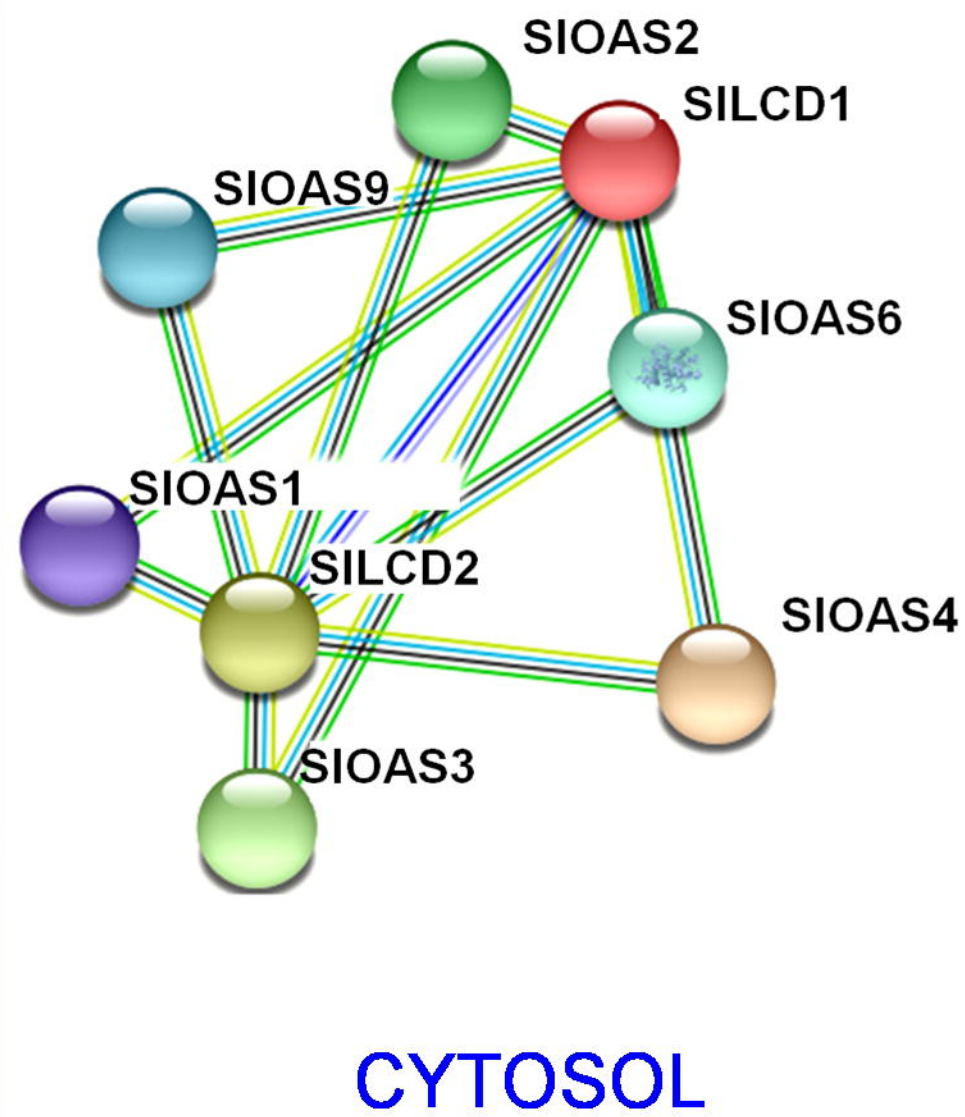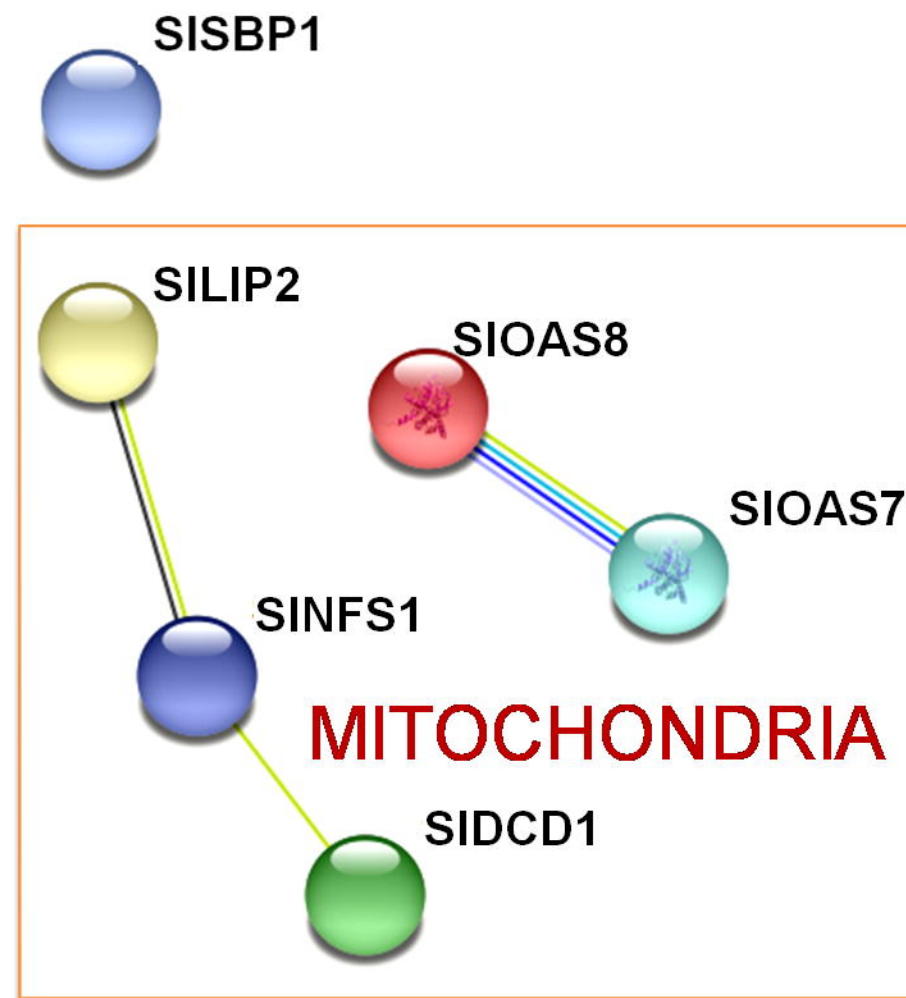

## A. Development

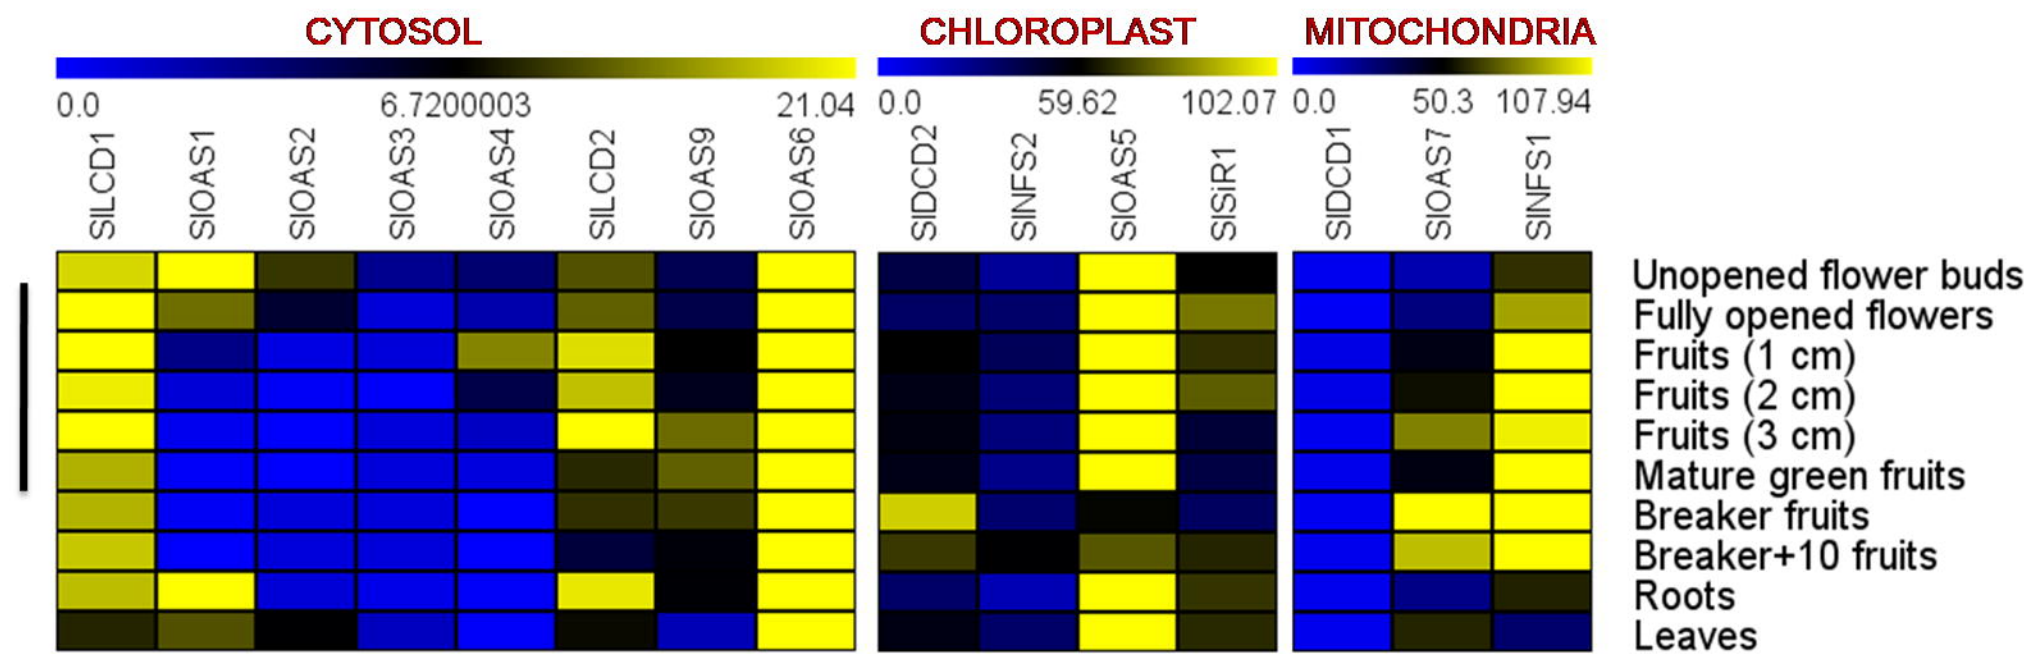

## B. Biotic Stress

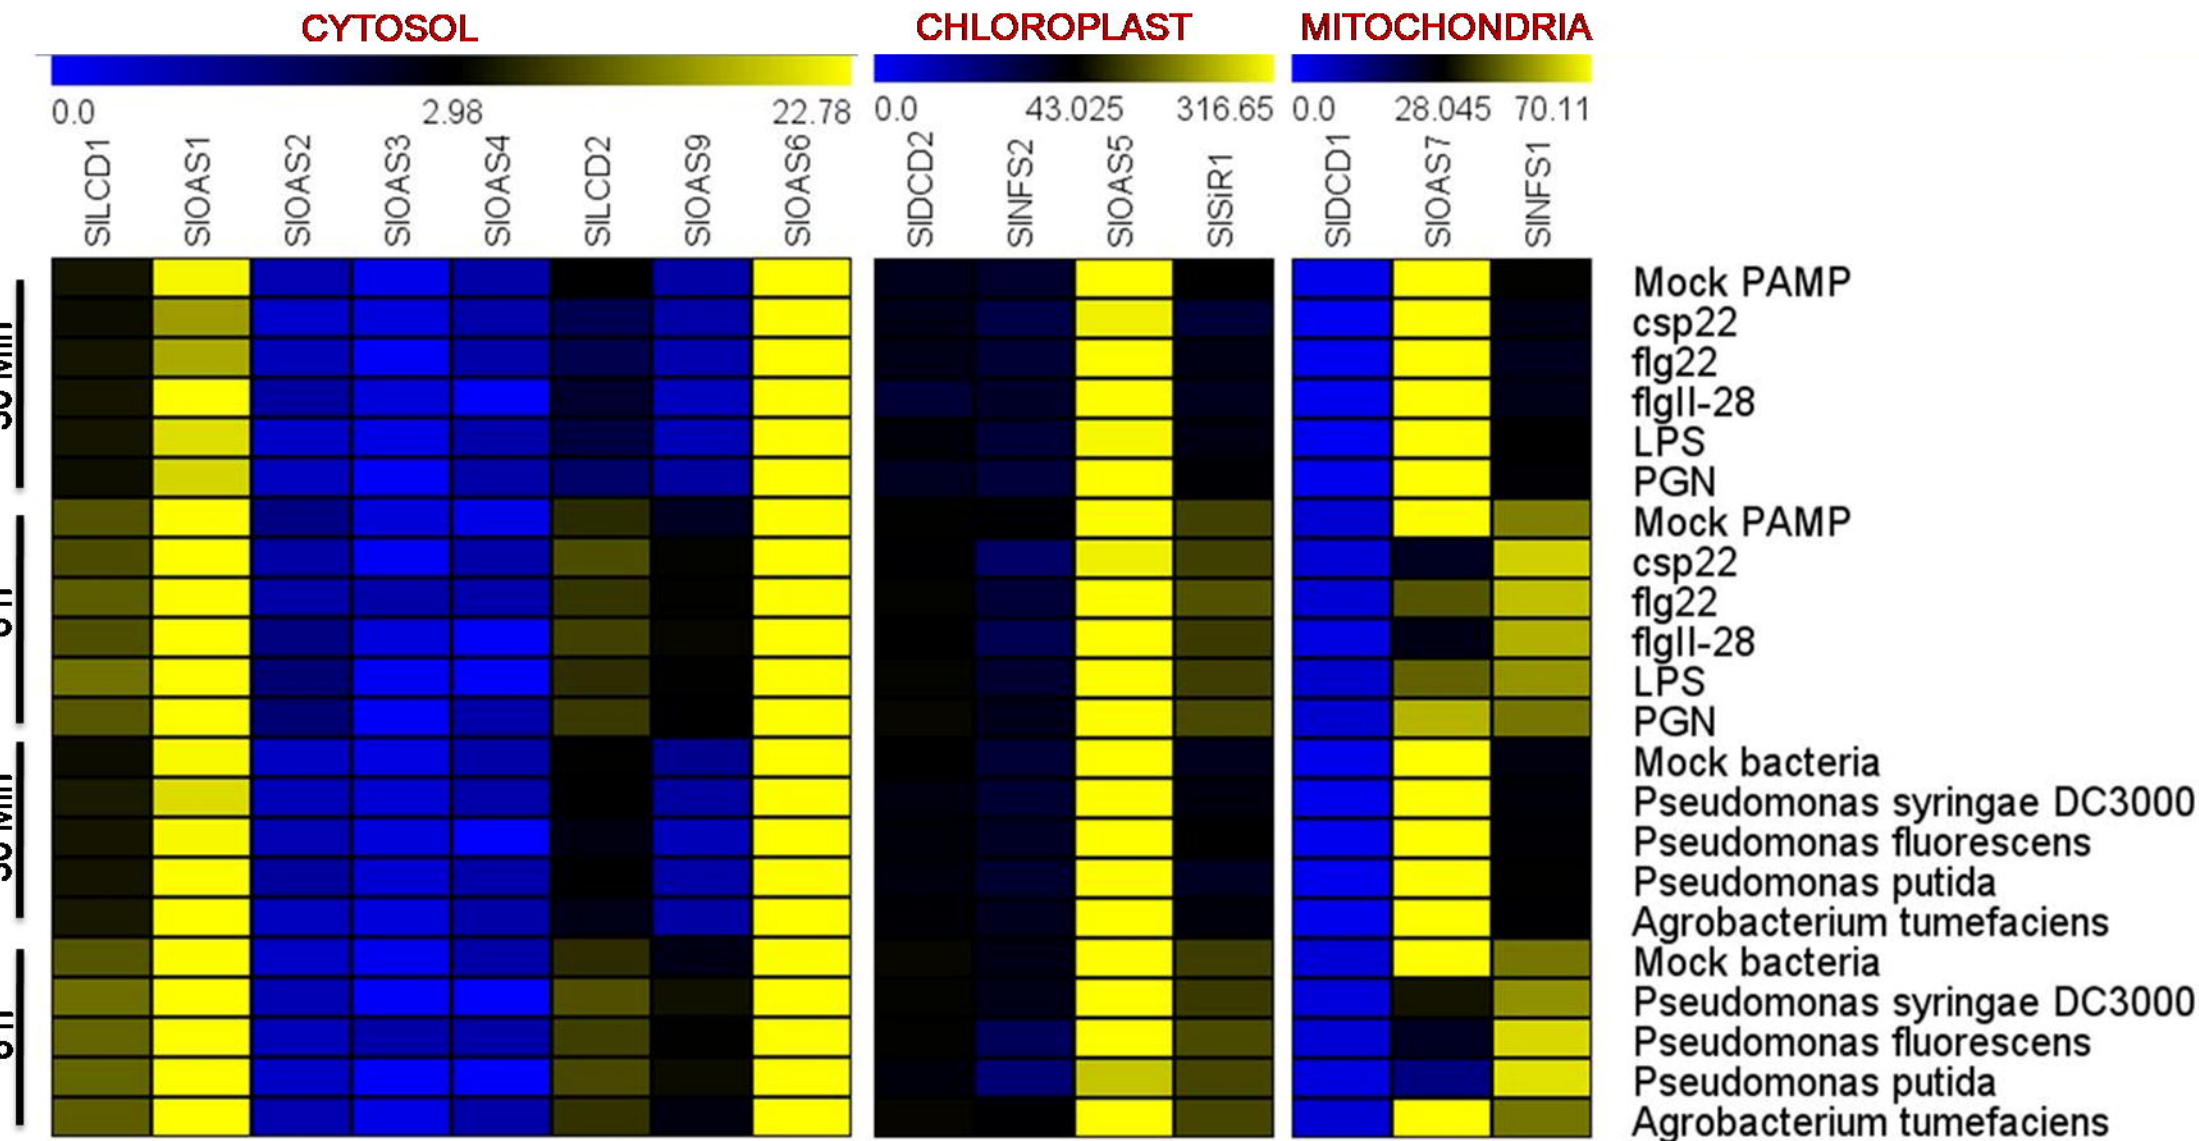

Source: https://www.biorxiv.org/content/10.1101/2021.09.25.461755v1.full.pdf
